# Supplementary material for: The origin and impeded dissemination of the DNA phosphorothioation system in prokaryotes
Source: PubMed Central journal article supplement (PMC8569181; doi:10.1038/s41467-021-26636-7), 2021-11-04
Supplement: 41467_2021_26636_MOESM1_ESM.pdf [file 41467_2021_26636_MOESM1_ESM.pdf]

## Supplementary Information

### The origin and impeded dissemination of the DNA phosphorothioation system in prokaryotes

**Authors:** Huahua Jian<sup>1, 2†</sup>, Guanpeng Xu<sup>1†</sup>, Yi Yi<sup>1†</sup>, Yali Hao<sup>1</sup>, Yinzhao Wang<sup>1</sup>, Lei Xiong<sup>3</sup>, Siyuan Wang<sup>1</sup>, Shunzhang Liu<sup>1</sup>, Canxing Meng<sup>1</sup>, Jiahua Wang<sup>1</sup>, Yue Zhang<sup>1</sup>, Chao Chen<sup>3</sup>, Xiaoyuan Feng<sup>1, 4</sup>, Haiwei Luo<sup>4</sup>, Hao Zhang<sup>4</sup>, Xingguo Zhang<sup>5</sup>, Lianrong Wang<sup>3</sup>, Zhijun Wang<sup>1</sup>, Zixin Deng<sup>1</sup>, Xiang Xiao<sup>1, 2\*</sup>

\*Correspondence. E-mail: zjxiao2018@sjtu.edu.cn

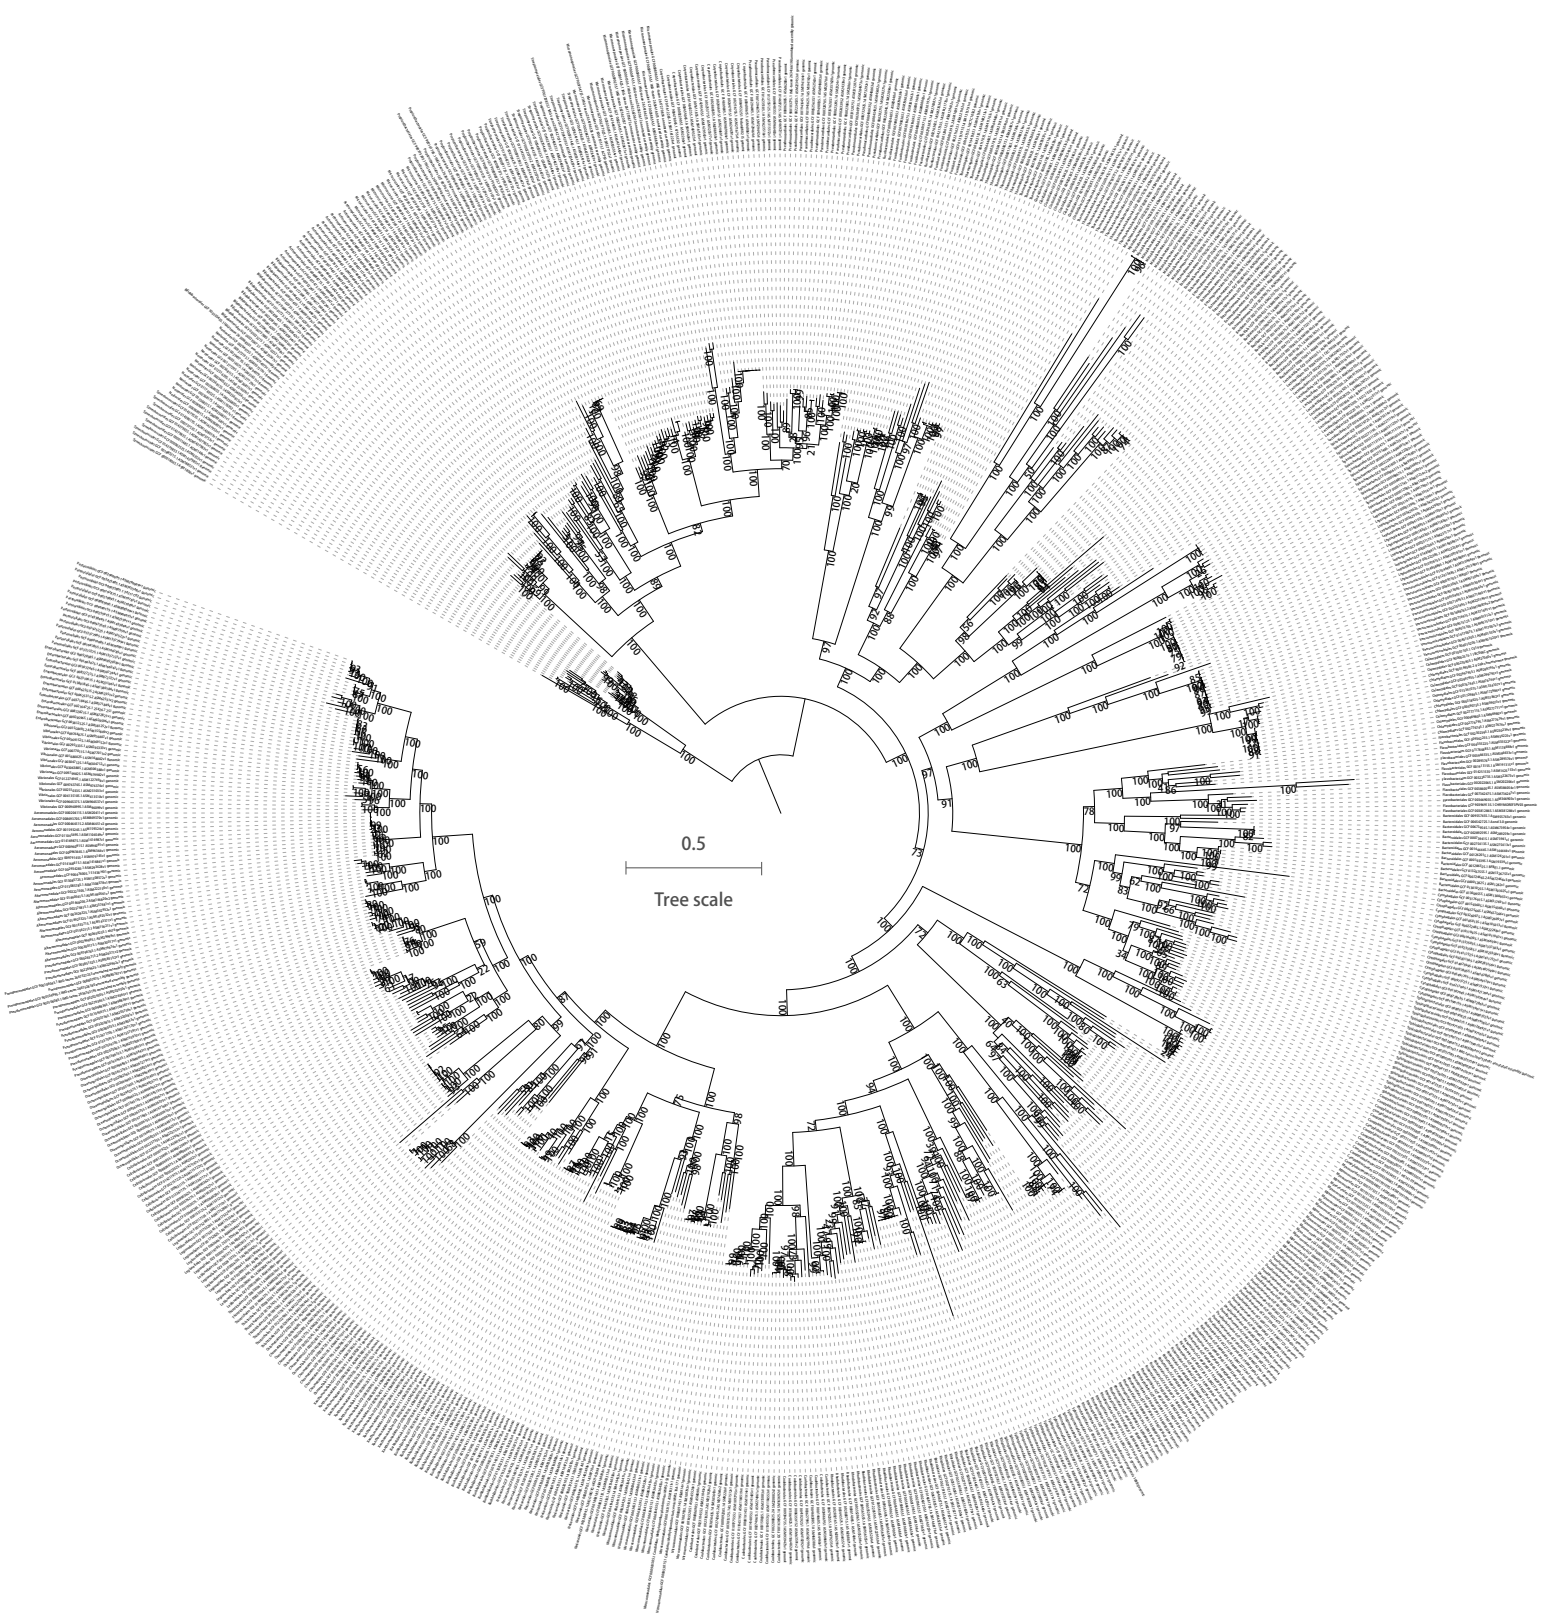

**Fig. S1.** Reference phylogenetic tree of major lineages of bacteria. A total of 120 conserved proteins from 771 bacterial genomes were identified, concatenated and aligned by GTDB-Tk<sup>1</sup>. The tree was reconstructed using FastTree v2.1.9<sup>2</sup> based on the maximum-likelihood algorithm and visualized by iTOL<sup>3</sup>. Sericytochromatia was set as the root lineage. Bootstrap support estimated from 1,000 replicates is listed below or above each branch. Only the bacterial orders with  $\geq 30$  high-quality genomes are shown.



**Fig. S2.** Reference phylogenetic trees of major lineages of archaea. A total of 122 conserved proteins from 97 archaeal genomes were identified, concatenated and aligned by GTDB-Tk<sup>1</sup>. The tree was reconstructed using FastTree v2.1.9<sup>2</sup> based on the maximum-likelihood algorithm and visualized by iTOL<sup>3</sup>. Bootstrap support estimated from 1,000 replicates is listed below or above each branch. Only the bacterial orders with  $\geq 30$  high-quality genomes are shown.

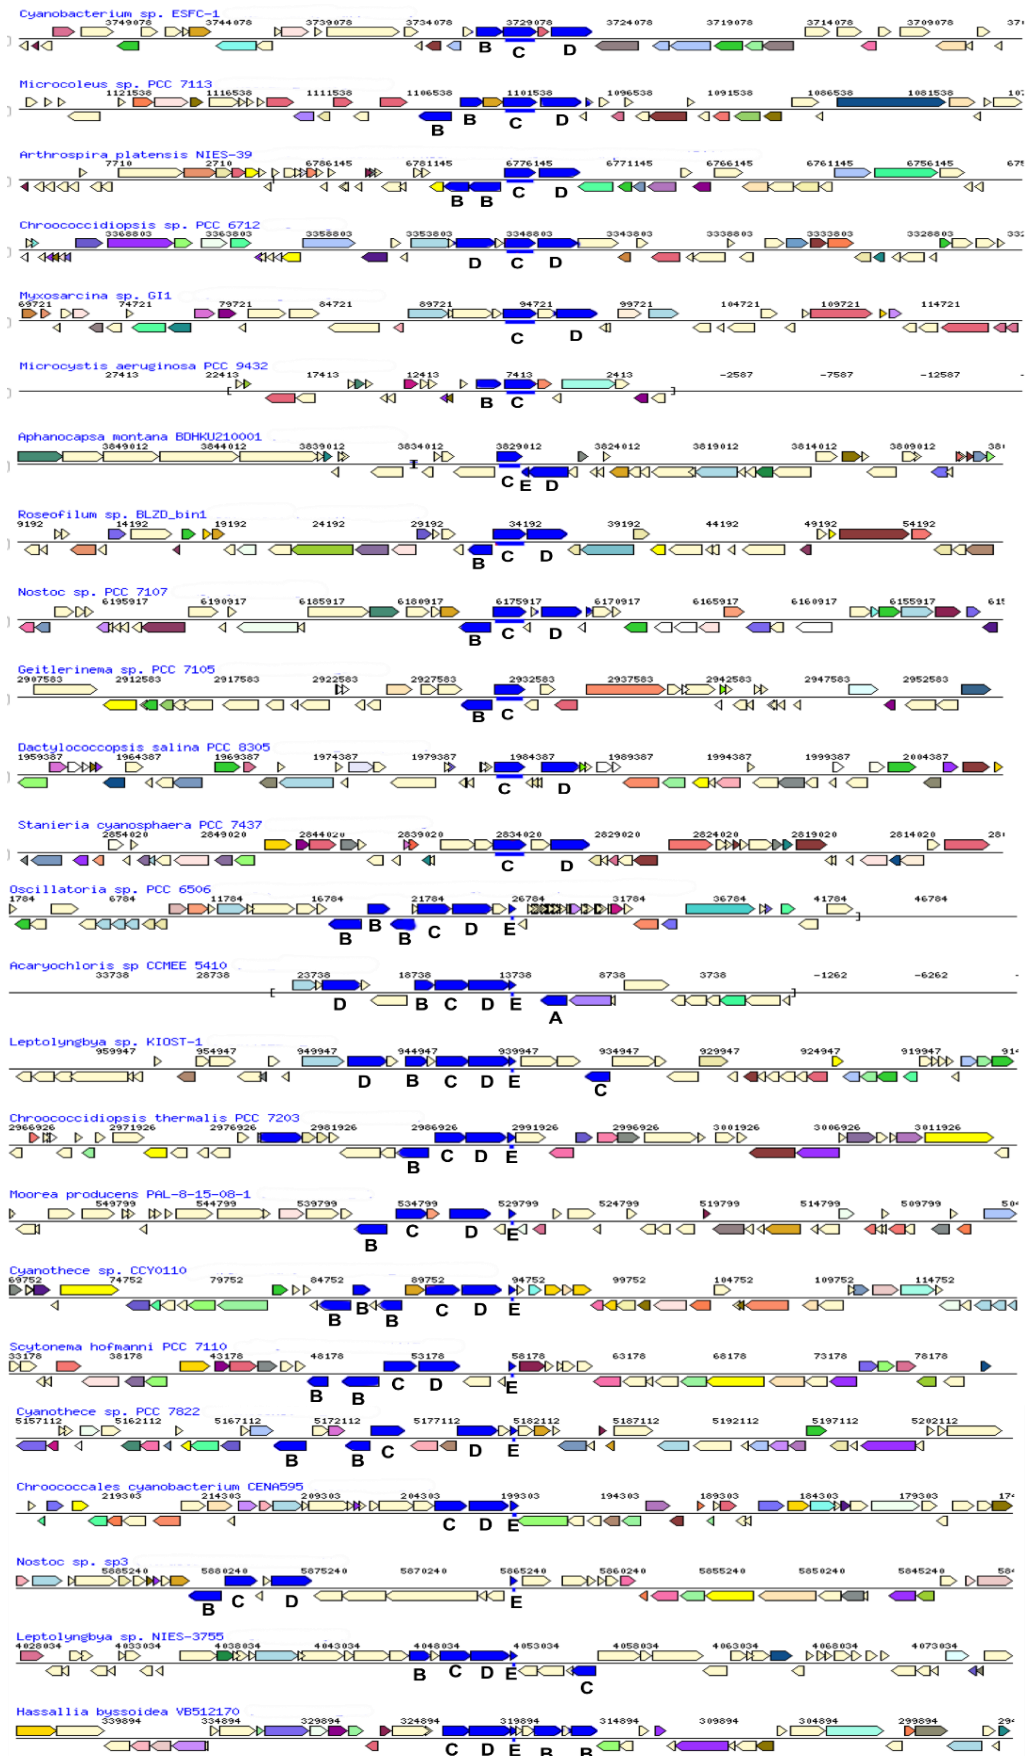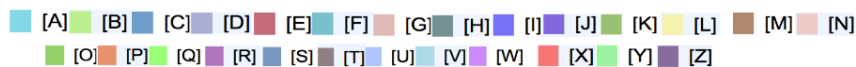

**Fig. S3.** The *dnd* gene cluster in cyanobacteria genomes. The *dnd* genes are indicated in blue. The *dndA*, *dndB*, *dndC*, *dndD* and *dndE* genes are indicated with A, B, C, D and E, respectively.

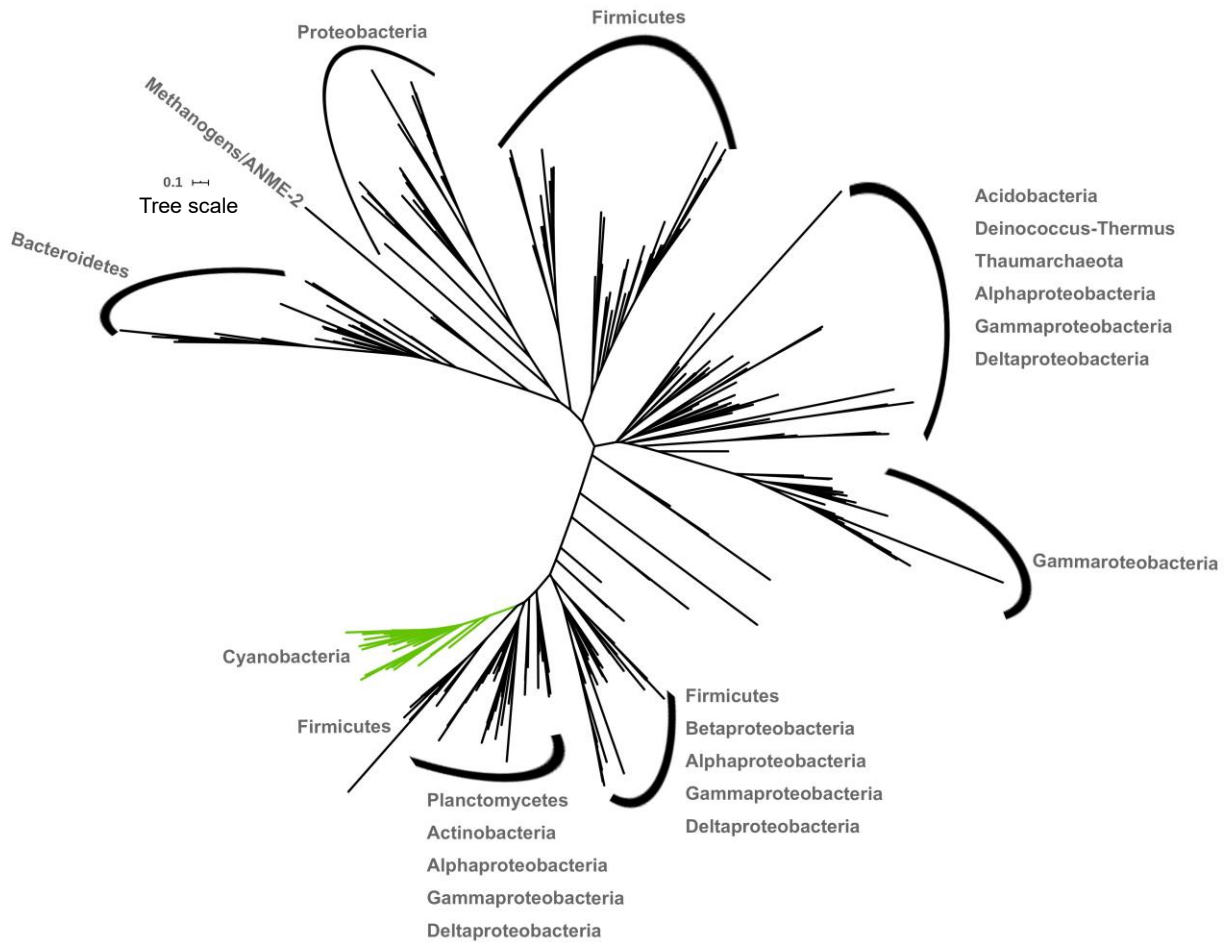

**Fig. S4.** Phylogenetic affiliations of DndC proteins. The phylogenetic tree was constructed based on the alignments of DndC that were generated using MAFFT and then filtered with trimAl, and the trees were built by the IQ-Tree method with model LG+C60+F+G and 1000 bootstrap replicates. The tree branches were classified into different bacterial or archaeal phyla or class groups. The green branch is Cyanobacteria, indicating an independent evolutionary path.





**Fig. S5.** Phylogenetic tree of Cyanobacteria. A total of 120 conserved proteins from Cyanobacteria genomes were identified, concatenated and aligned by GTDB-Tk<sup>1</sup>. The tree was reconstructed using FastTree v2.1.9<sup>2</sup> based on the maximum-likelihood algorithm and visualized by iTOL<sup>3</sup>. Sericytochromatia was set as the root lineage. Bootstrap support estimated from 1,000 replicates is listed below or above each branch.



**Fig. S6.** Phylogeny of DndD in cyanobacteria. The tree was reconstructed using FastTree v2.1.9<sup>2</sup> based on the maximum-likelihood algorithm and visualized by iTOL<sup>3</sup>. Bootstrap support estimated from 1,000 replicates is listed below or above each branch.

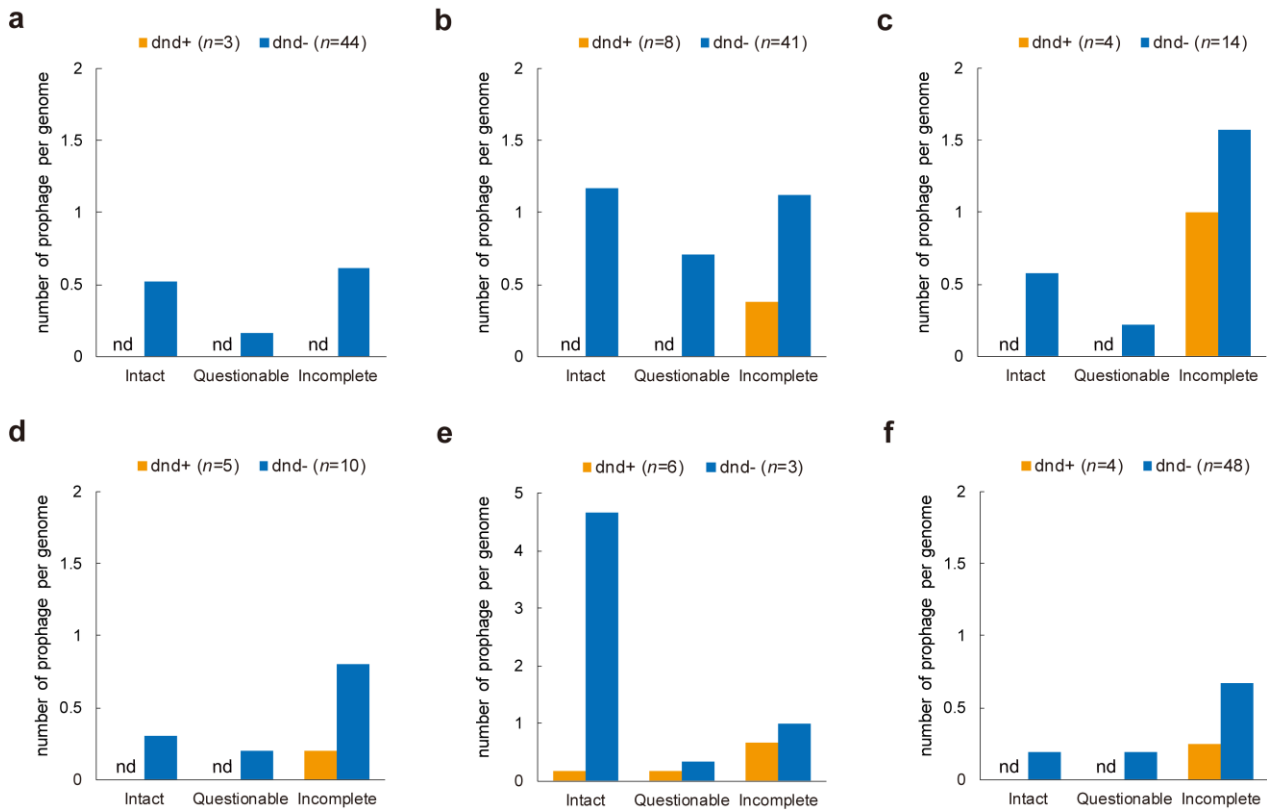

**Fig. S7.** Prophages in the *dnd*-positive strains are rare. Six different genera (**a**, *Shewanellaceae*; **b**, *Aeromonas*; **c**, *Halomonas*; **d**, *Marinobacter*; **e**, *Photobacterium*; **f**, *Rhodococcus*), which inhabited diverse environments, were chosen to analyse the relationship between the *dnd* gene cluster and prophages. The number of prophages in each bacterium was identified using the PHASTER tool<sup>4</sup>. The presence of a *dnd* gene cluster in each strain was determined according to a previous study<sup>5</sup>.

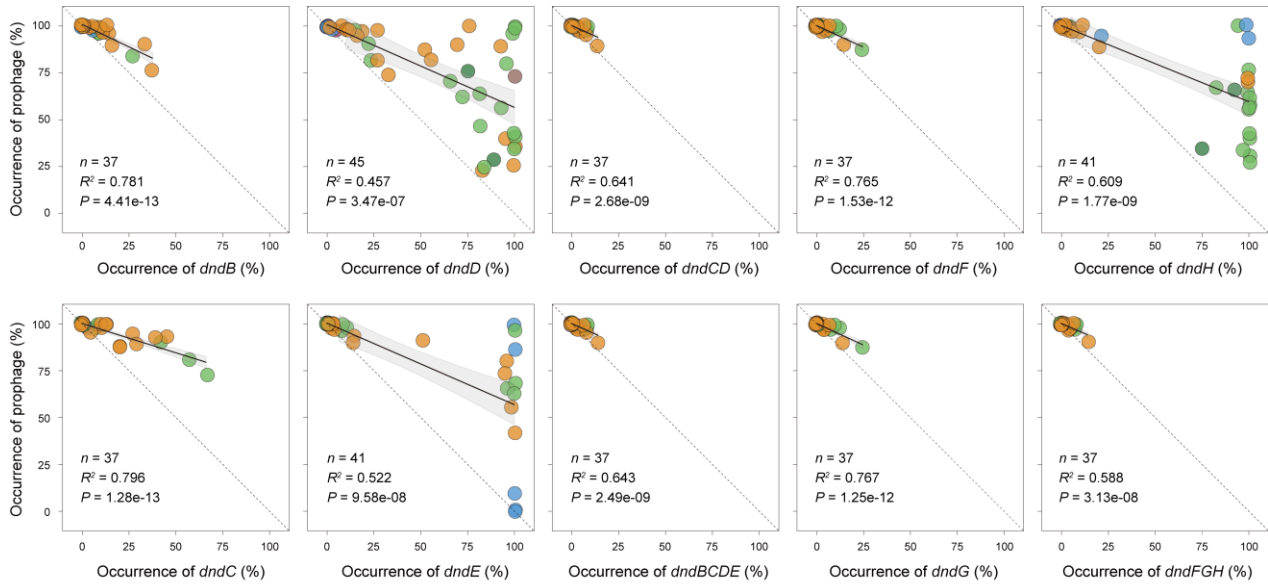

#### Taxonomy

● Actinobacteria   
 ● Firmicutes   
 ● Alphaproteobacteria   
 ● Betaproteobacteria   
 ● Gammaproteobacteria   
 ● Epsilonproteobacteria   
 ● Tenericutes

**Fig. S8.** Correlation analysis between the abundance of *dnd* genes/gene clusters and prophages among different species. The black solid line in each subplot refers to the best fitting, and the grey shadow displays the 95% confidence interval from linear regressions. The dashed lines depict the 1:1 linear relationship. The number of analysed species ( $n$ ),  $R$  values and  $P$  values of linear regressions are shown in each subplot. Each circle represents a single species and is depicted in the color representing the taxonomy at the phylum and class levels (for Proteobacteria).

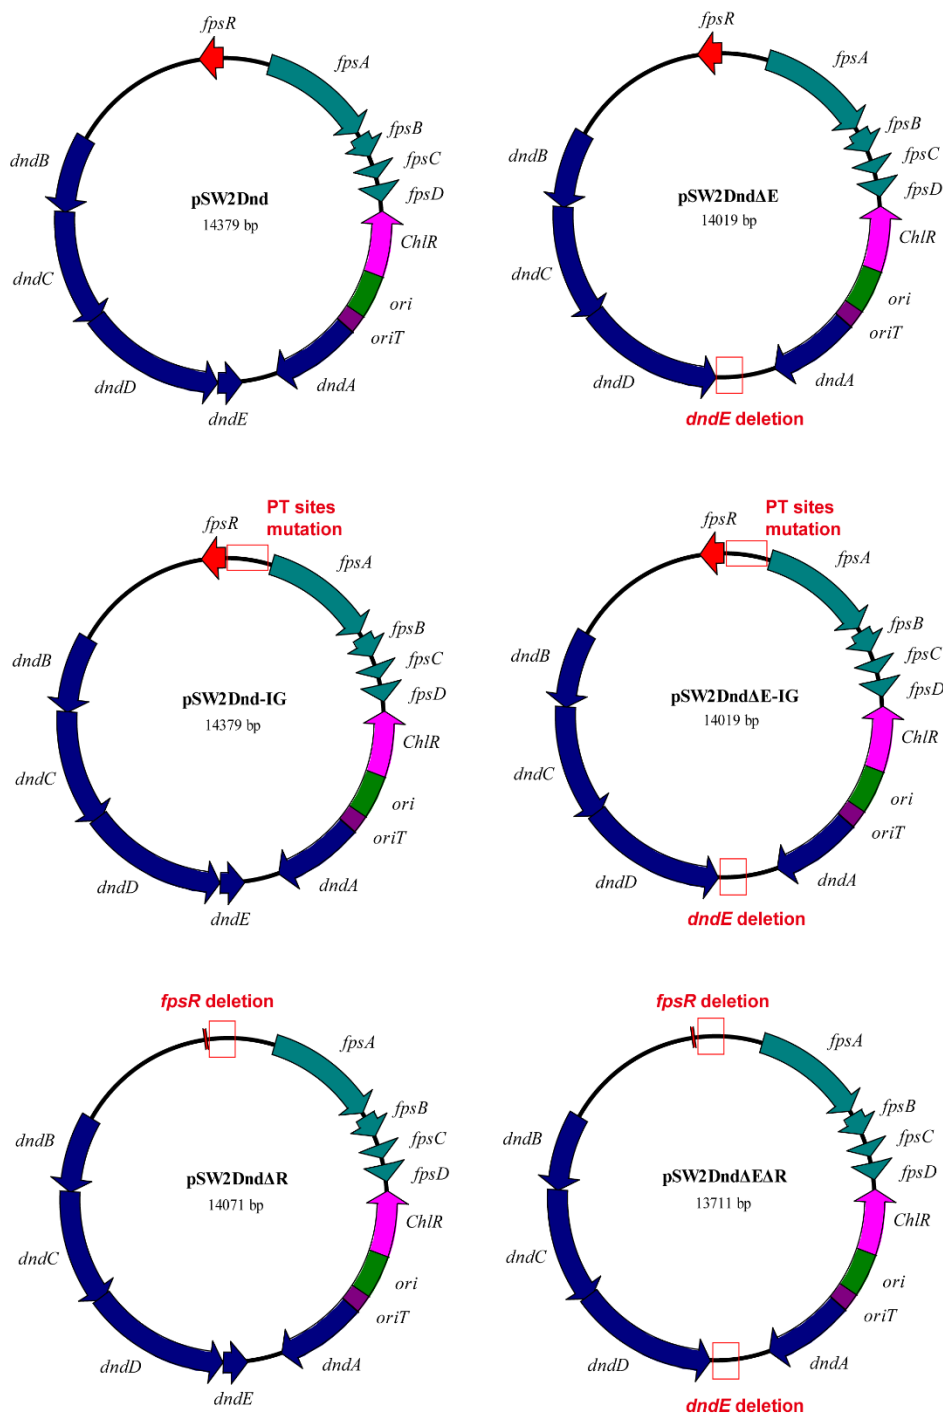

**Fig. S9.** Construction of the series of PT modification vectors based on pSW2Dnd<sup>6</sup>. A detailed method for the construction of vectors can be found in the Materials and Methods. The mutated components in each vector compared to pSW2Dnd are indicated by red boxes.

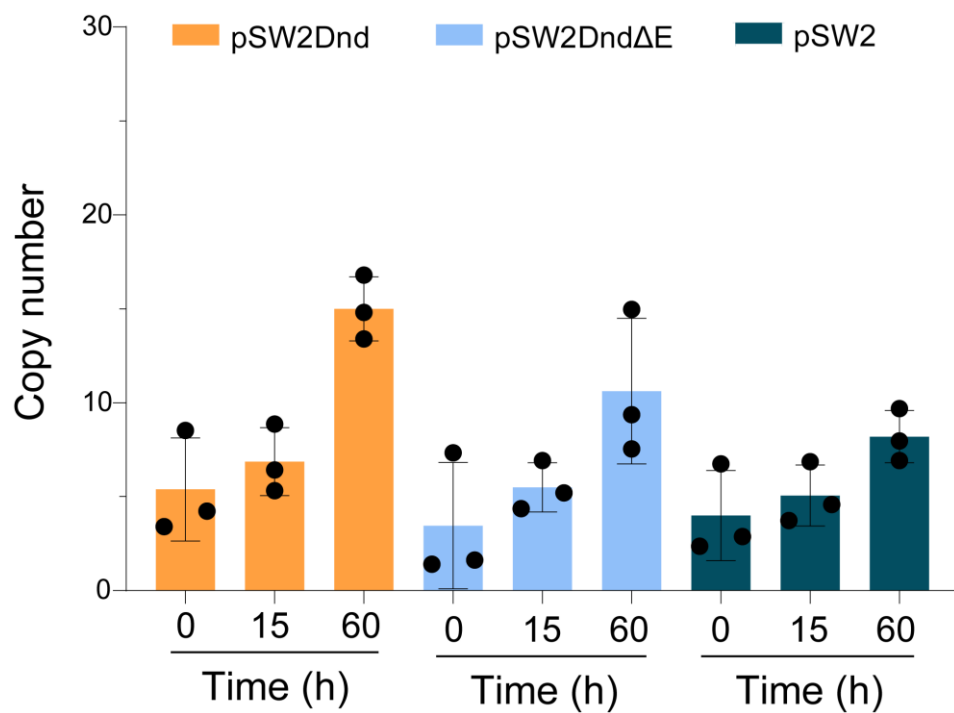

**Fig. S10.** Stability of different PT modification vectors. Samples were taken from cultures at different time points during the growth of WP3NR strains, and the DNA copy number was determined via qPCR. Data are represented as mean  $\pm$  s.d.. and are based on three biologically independent samples.



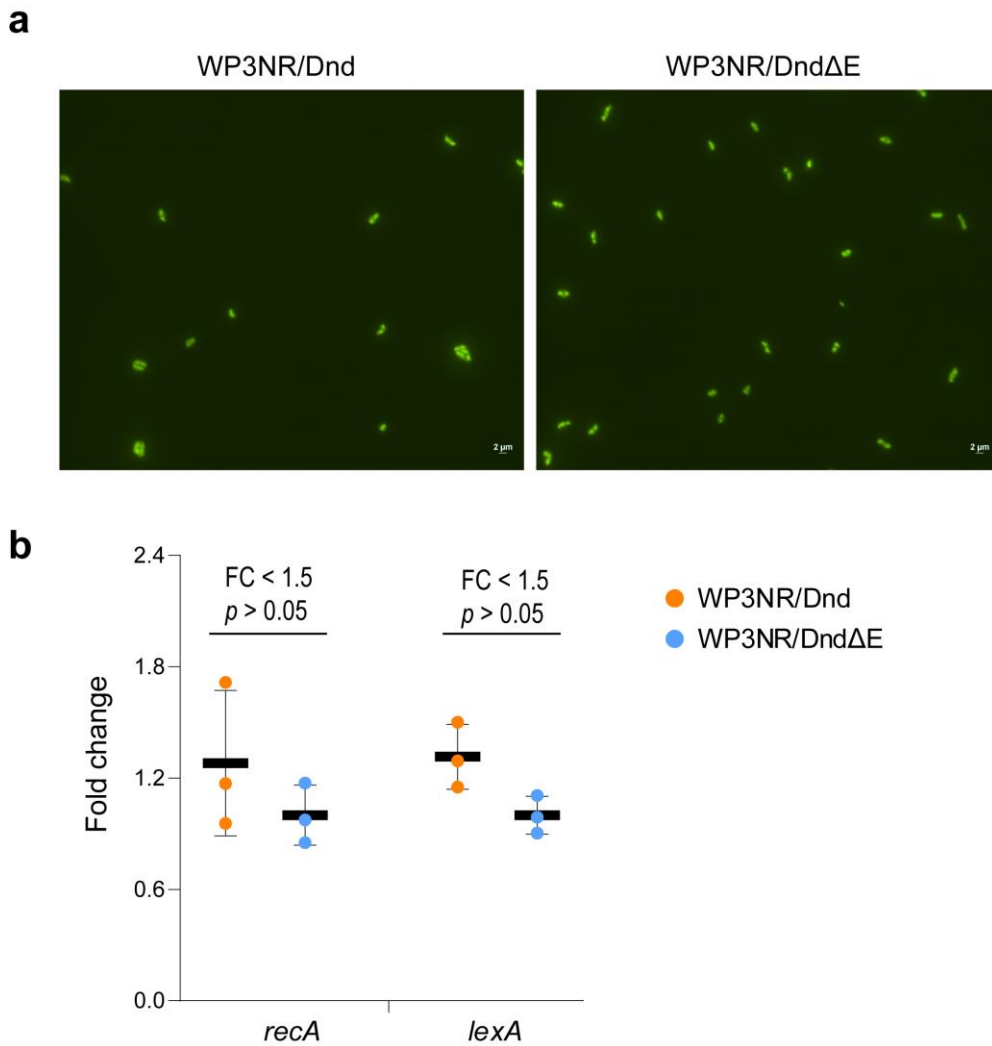

**Fig. S11.** Examination of the potential SOS response in WP3NR strains. **a.** Cell morphology of WP3NR/Dnd and WP3NR/DndΔE. The cells were stained with SYBR-Gold and visualized by epifluorescence microscopy. The scale bars are shown at the bottom right. Results are representative of two independent experiments. **b.** Relative transcriptional levels of the key SOS pathway genes *recA* and *lexA* in the PT-modified strain. The transcription level of the non-PT modified strain WP3NR/DndΔE was set as 1. Data are represented as mean  $\pm$  s.d., and are based on three biologically independent samples. The data were analysed by two-sided unpaired Student's *t* test. Specifically,  $P = 0.3162$  for *recA* and  $P = 0.0546$  for *lexA* in WP3NR/Dnd vs WP3NR/DndΔE.

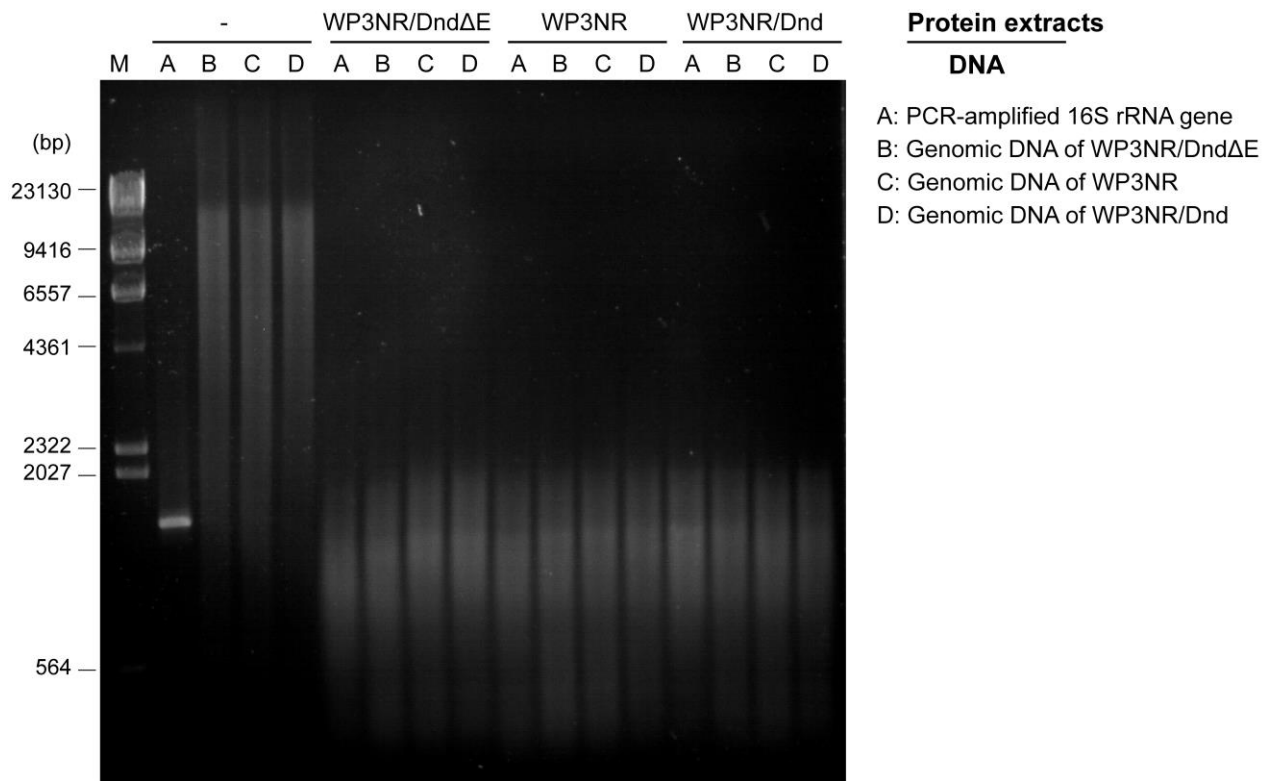

**Fig. S12.** Nuclease activity assay of WP3NR strains. Cell lysates derived from different bacterial cultures grown to the mid-exponential phase were assayed for their nuclease activity by the addition of DNA fragments of the 16S rRNA gene and genomic DNA of different strains. DNA without the addition of supernatants was used as a control. Images of representative agarose gels from two independent experiments are shown. M = Lambda DNA/HindIII marker (Fermentas).

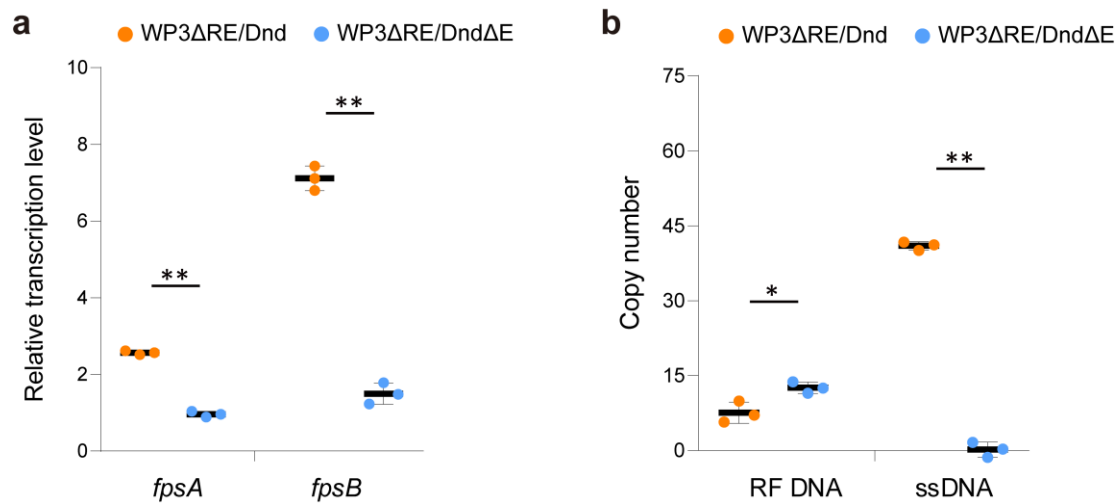

**Fig. S13.** PT modification influences the gene transcription and DNA replication of phage SW1. **a.** RTLs of SW1 genes in the WP3ΔRE/Dnd and WP3ΔRE/DndΔE strains. **b.** RF DNA and ssDNA copy numbers of SW1 in the WP3ΔRE/Dnd and WP3ΔRE/DndΔE strains. Data are represented as mean  $\pm$  s.d.. and are based on three biologically independent samples. The data were analysed by two-sided unpaired Student's *t* test. Specifically,  $P = 7.01 \times 10^{-6}$  (\*\*) for *fpsA* and  $P = 2.14 \times 10^{-5}$  (\*\*) for *fpsB* in WP3ΔRE/Dnd vs WP3ΔRE/DndΔE;  $P = 0.0233$  (\*) for RF DNA and  $P = 2.10 \times 10^{-6}$  (\*\*) for ssDNA in WP3ΔRE/Dnd vs WP3ΔRE/DndΔE.

```

1   TATAGCGACA AGTGTTTCTA GGTTTGGATT GTTTTCCGTTTCG CCCCTTTCCA
51  TTCTAGATAG TTGTGCCGTG GATACACCAG ACCTATCTAT AAGCTCTTGAA
101 CGTGTTCATTC CAAGGCTTTT ACGCTTGAGC TTTATATTTT CACCAATTGT
151 CATTTTTTTGAA CTSS of fpsA |>CTTTGTGGG GGCATGTATG ACTTATTTAA ACTATTTTCT
201 TGCATGTTTG ATCTTTAGGT TGTACGCTTG CGTCATATTG ATTGCATGGA
251 TTATATATTT GATGTCTAGA AAAAGATATT ATTTACAGGA TTTACCGACA
301 CCTTTAACTA GTTTTACTGG TAGTTTCGGTCT TGTACTACTG CTGAAAAAGTT
351 CGATACTTGCC AGTTCAGGTTT GCTTGTCTTG CGGTCATGAA TATGAATCGG
401 ACTCTGTAGT CACTTGCCCC GTCTGTGCTT CTAAACTCAC TTATTCAGAA
451 GATTCTTTTT TACCTGACAC AAAGAAAGCA ACTTTTAGCA TAGTTGGCGA
501 AGCCACGGCT AACCCGCTTG ATTTGGGTTT GAGTTTCCAACA CTTTTAGATA

```

**Fig. S14.** Base substitution of PT motifs in the *fpsA-fpsR* intergenic region. The transcription start sites of the *fpsA* and *fpsR* genes are marked with angled arrows. The PT modification motifs are highlighted in red. The single-base mutations are underlined with solid lines, and the substituted bases are indicated above.

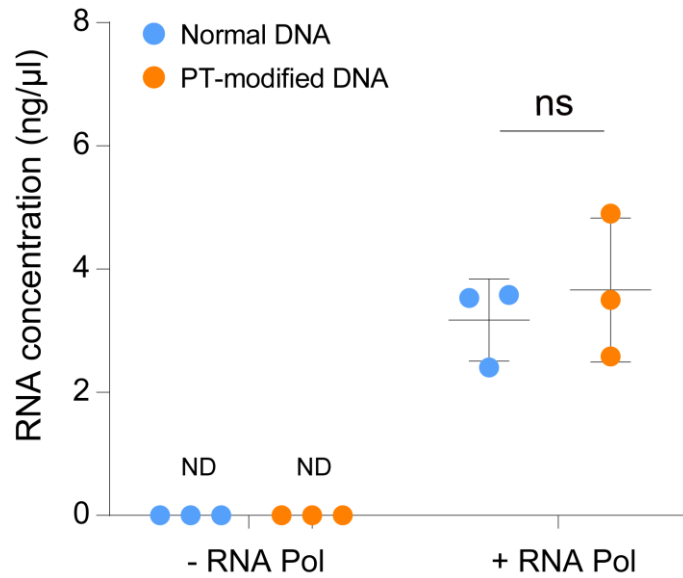

**Fig. S15.** In vitro transcription assay of PT-modified DNA and normal DNA. The influence of PT modification on RNA polymerase activity was assessed by quantifying the amount of synthesized RNA. Reaction mixtures lacking RNA polymerase addition were used as negative controls. ND, not detected. Data are represented as mean  $\pm$  s.d.. and are based on three biologically independent samples. The data were analysed by two-sided unpaired Student's *t* test. Specifically,  $P = 0.3631$  (ns, not significantly different) for the PT-modified and normal DNA.

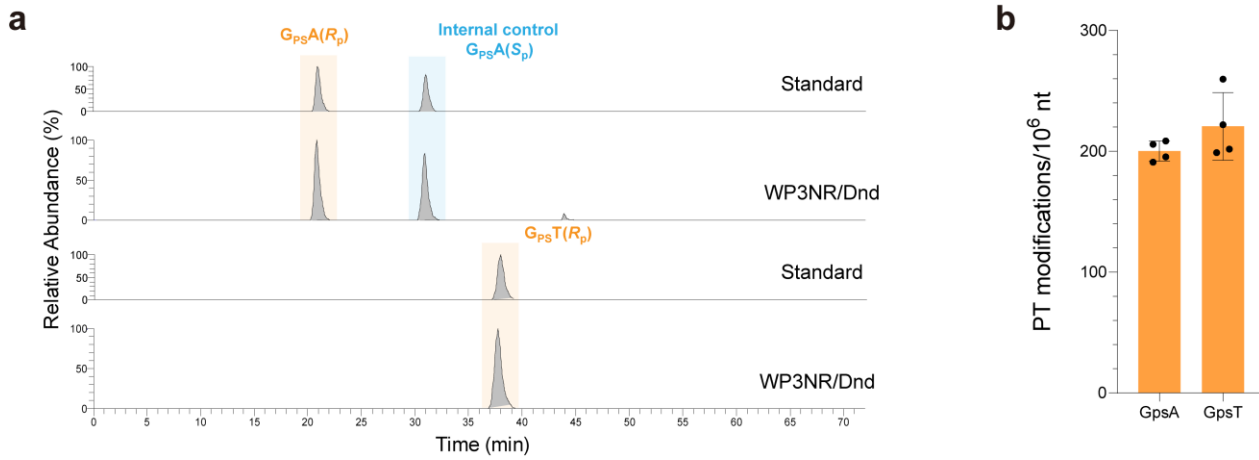

**Fig. S16. a.** PT modifications in WP3NR/Dnd quantified using LC-MS/MS. Chemically synthesized d( $G_{ps}A$ ) and d( $G_{ps}T$ ) in the  $R_p$  configuration were used as references. PT-linked dinucleotides were detected in the hydrolysate of WP3NR/Dnd genomic DNA. Representative results from four replicate assays are shown. **b.** Quantification of PT modifications ( $G_{ps}A$  and  $G_{ps}T$ ) in WP3NR/Dnd. Data are represented as mean  $\pm$  s.d. and are based on four biologically independent samples.

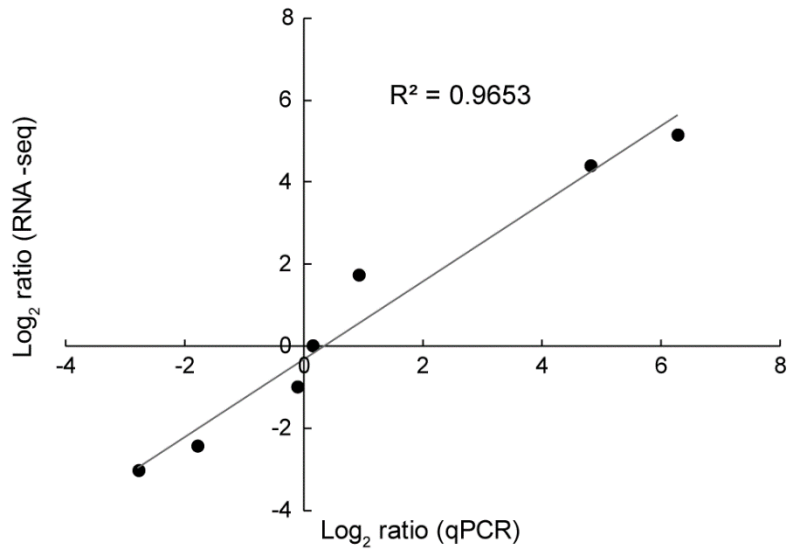

**Fig. S17.** Correlation analysis of the RNA-seq and RT-qPCR assays. Seven genes showing different expression levels were selected randomly for this assay. The RT-qPCR log<sub>2</sub> values were plotted against the RNA-seq log<sub>2</sub> values, and the correlation coefficient ( $R^2$ ) is shown in the plot.

WP3NR/Dnd

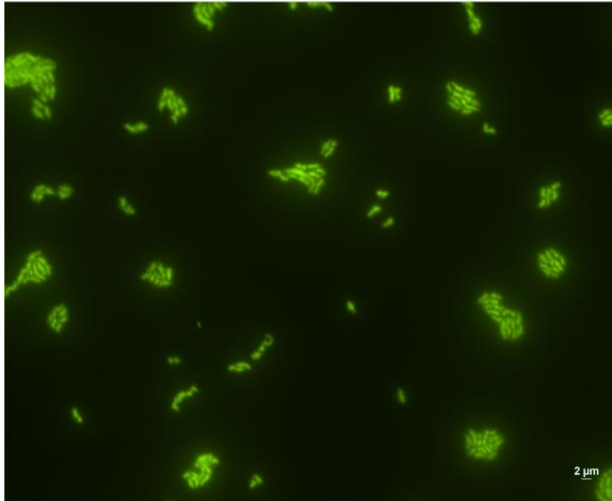

WP3NR/DndΔE

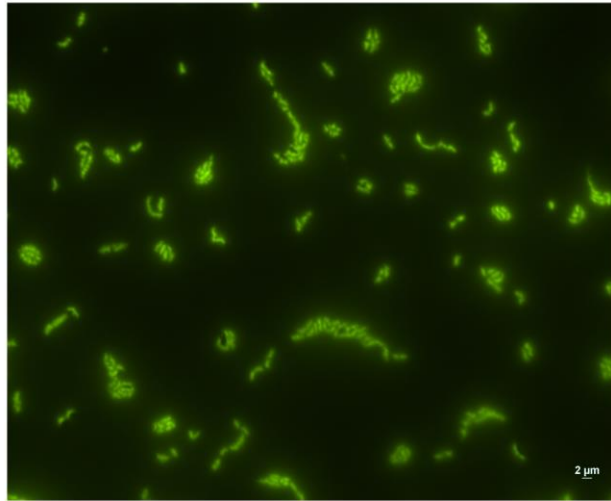

**Fig. S18.** Cell morphology of the PT-modified strain WP3NR/Dnd. The cells were stained with SYBR-Gold and visualized by epifluorescence microscopy. The scale bars are shown at the bottom right. Results are representative of two independent experiments.



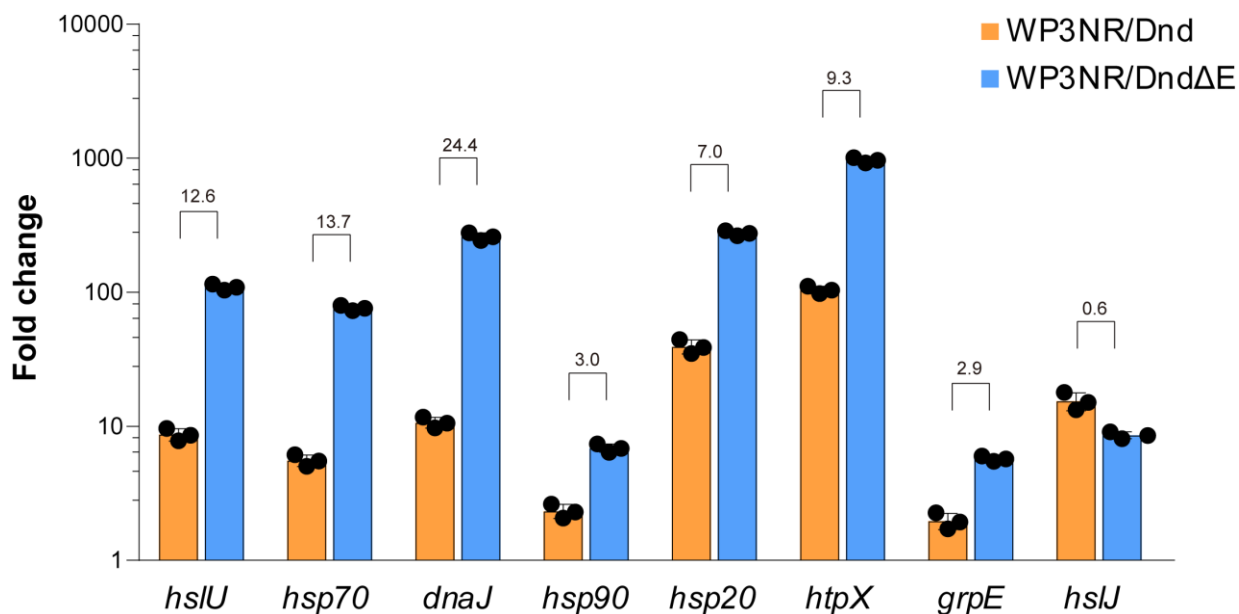

**Fig. S19.** PT modification influences the transcription of heat-shock genes in WP3 under high-temperature stress. The relative transcription levels of genes encoding heat shock proteins in the WP3NR/Dnd strain were compared with those in the WP3NR/DndΔE strain at 28°C. The transcription levels of these genes in the WP3NR/DndΔE strain at 20°C were set as 1. Data are represented as mean ± s.d.. and are based on three biologically independent samples.

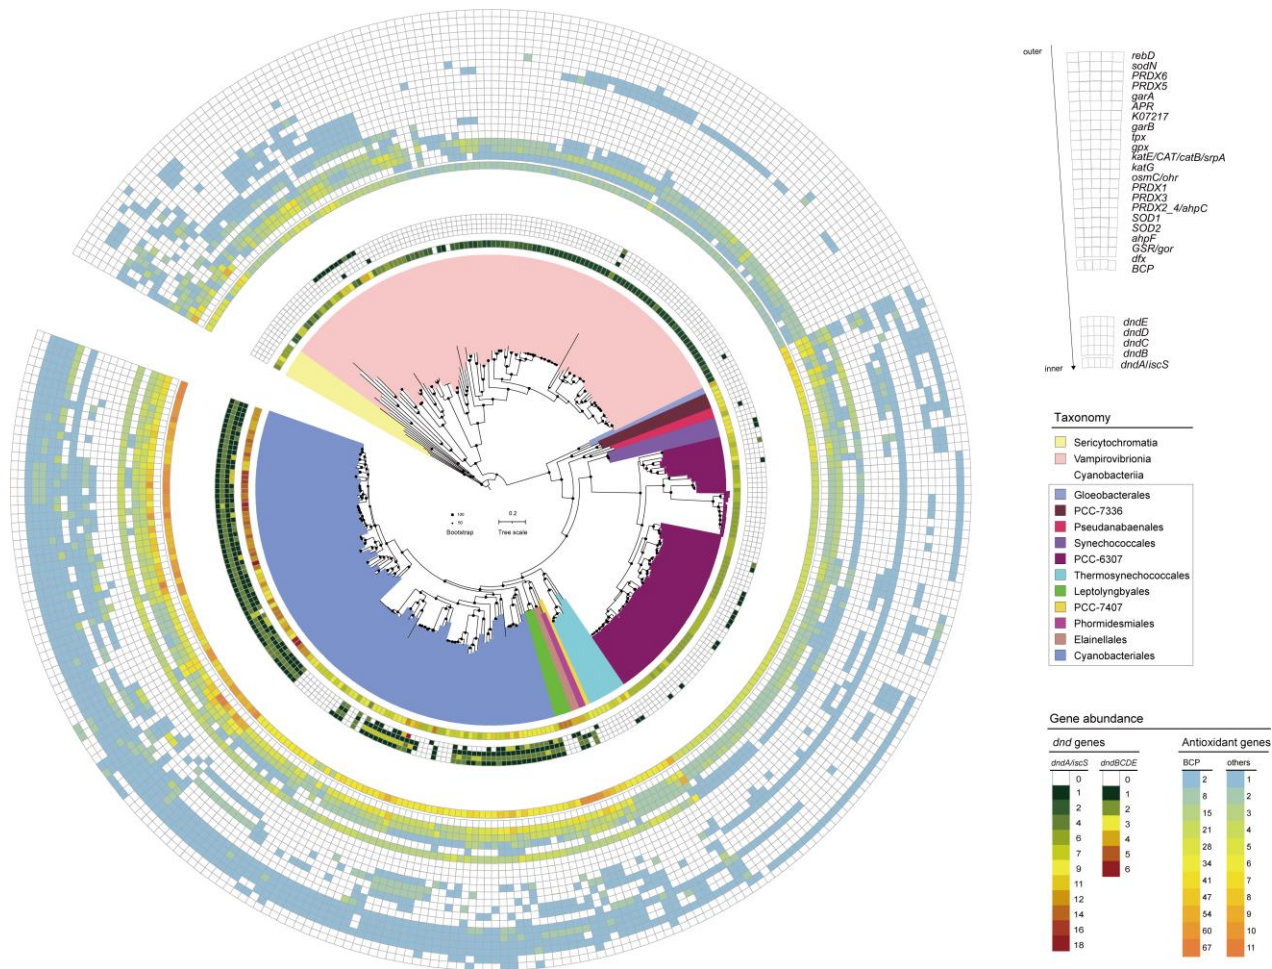

**Fig. S20.** Phylogenetic distribution of antioxidant genes in Cyanobacteria. The phylogenetic tree and distribution of *dnd* genes are shown in Fig. 2b in the main text. The antioxidant genes were identified based on their KEGG annotation. Antioxidant genes are abbreviated as follows: *BCP*, peroxiredoxin Q/BCP (K03564); *dfx*, superoxide reductase (K05919); *GSR/gor*, glutathione reductase (NADPH) (K00383); *ahpF*, alkyl hydroperoxide reductase subunit F (K03387); *SOD2*, superoxide dismutase (Fe-Mn family) (K04564); *SOD1*, superoxide dismutase (Cu-Zn family) (K04565); *PRDX2\_4/ahpC*, peroxiredoxin (alkyl hydroperoxide reductase subunit C) (K03386); *PRDX3*, peroxiredoxin 3 (K20011); *PRDX1*, peroxiredoxin 1 (K13279); *osmC/ohr*, lipoyl-dependent peroxidase (K04063); *katG*, catalase-peroxidase (K03782); *katE/CAT/catB/srpA*, catalase (K03781); *gpx*, glutathione peroxidase (K00432); *tpx*, thiol peroxidase, atypical 2-Cys peroxiredoxin (K11065); *garB*, glutathione amide reductase (K23076); Mn-containing catalase (K07217); *APR*, adenylyl-sulfate reductase

(glutathione) (K05907); *garA*, glutathione amide-dependent peroxidase (K23075); *PRDX5*, peroxiredoxin 5, atypical 2-Cys peroxiredoxin (K11187); *PRDX6*, peroxiredoxin 6,1-Cys peroxiredoxin (K11188); *ahpD*, alkyl hydroperoxide reductase subunit D (K04756); *sodN*, nickel superoxide dismutase (K00518); *rebD*, dichlorochromopyrrolate synthase/catalase (K19885); *GPX4*, phospholipid-hydroperoxide glutathione peroxidase (K05361). The circular heatmap shows the abundance of *dnd* genes and antioxidant genes in Cyanobacteria genomes.

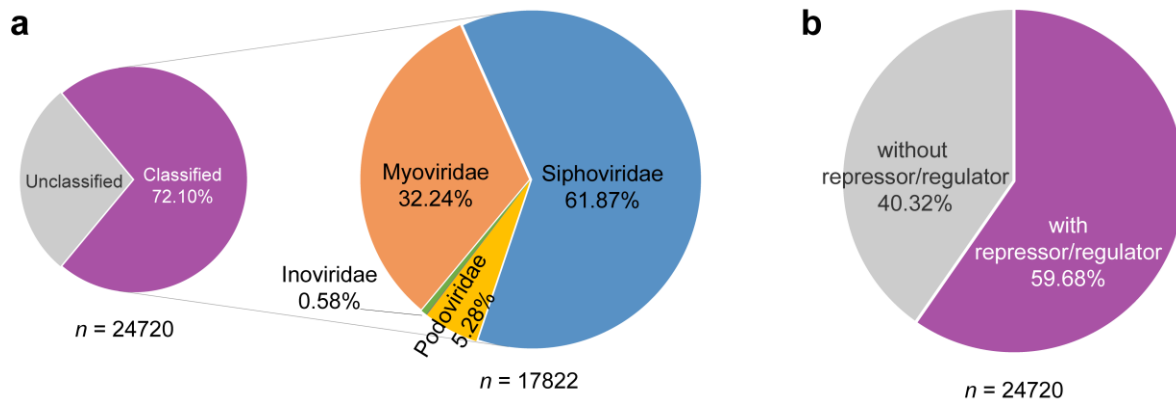

**Fig. S21. a.** Taxonomic classification of the prophages identified in bacterial genomes. The pie chart on the left indicates the percentage of prophages with taxonomic assignment (purple), and the pie graph on the right shows the relative abundance (%) of viral taxa at the family level for those prophages with predicted taxonomy. **b.** Occurrence of repressors and regulators encoded by prophages.

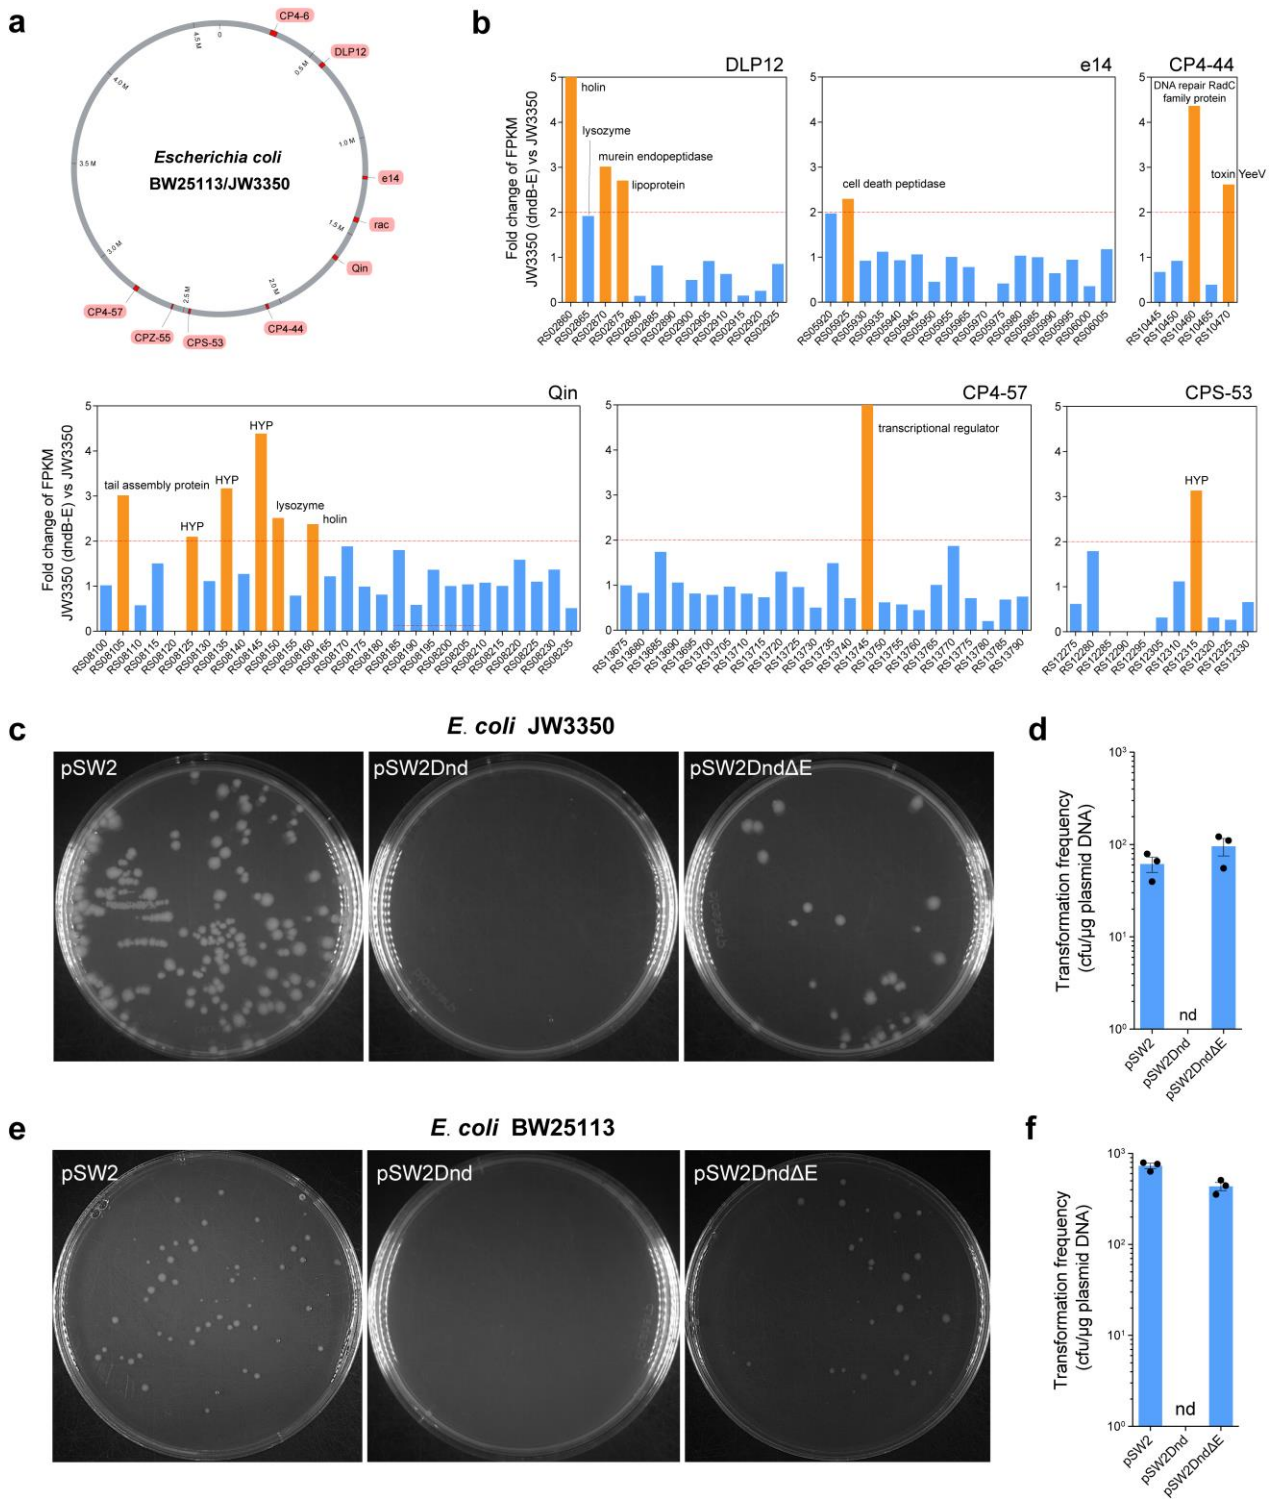

**Fig. S22.** The effect of PT modification on prophage gene expression and plasmid transfer of *E. coli*. **a.** The distribution of prophages (highlighted in red) in the *E. coli* BW25113 and JW3350 genomes. **b.** The expression levels of prophage genes in JW3350/Dnd compared with those in JW3350 measured by FPKM (fragments per kilobase per million). The red dashed line indicates a 2-fold change, which is considered

the threshold for differentially expressed genes. The publicly available transcriptomic data were obtained from a previous study (accession number GSE135938 in the GEO database)<sup>7</sup>. **c-f**. Transformation of pSW2Dnd and pSW2DndΔE to *E. coli* JW3350 (**c-d**) and BW25113 (**e-f**). The transformation frequency was calculated as the number of transformants per μg plasmid DNA. nd: not detected in the current assays (transformation frequency < 1.1×10<sup>1</sup>). Data are represented as mean ± SEM and are based on three independent experiments.

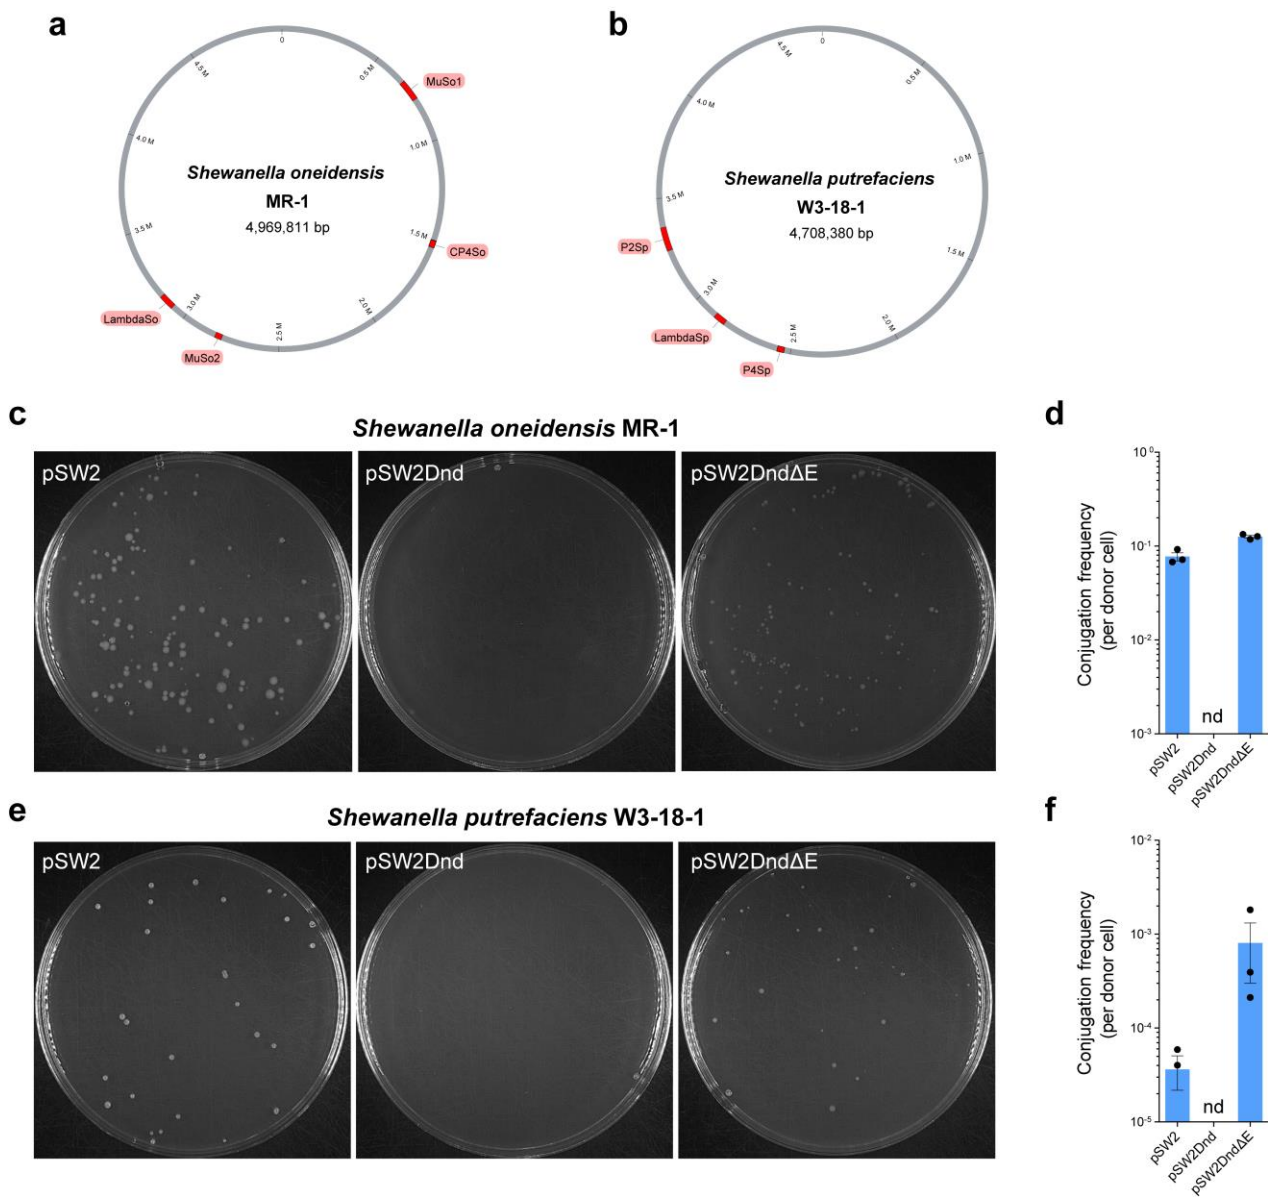

**Fig. S23. a-b.** Conjugation assay of plasmids pSW2Dnd and pSW2DndΔE to *Shewanella* strains. **a-b.** The distribution of prophages (highlighted in red) in the *S. oneidensis* MR-1 (**a**) and *S. putrefaciens* W3-18-1 (**b**) genomes. **c-f.** Conjugal transfer of pSW2Dnd and pSW2DndΔE to *S. oneidensis* MR-1 (**c-d**) and *S. putrefaciens* W3-18-1 (**e-f**). The *E. coli* strain WM3064 harbouring pSW2Dnd or pSW2DndΔE was used as the donor. As a control, the WM3064 strain harbouring pSW2 was used. The conjugation frequency was calculated as the number of transconjugants per number of donors. nd: not detected in the current assays (conjugation frequency  $< 1.1 \times 10^{-7}$ ). Data are represented as mean  $\pm$  SEM and are based on three independent experiments.

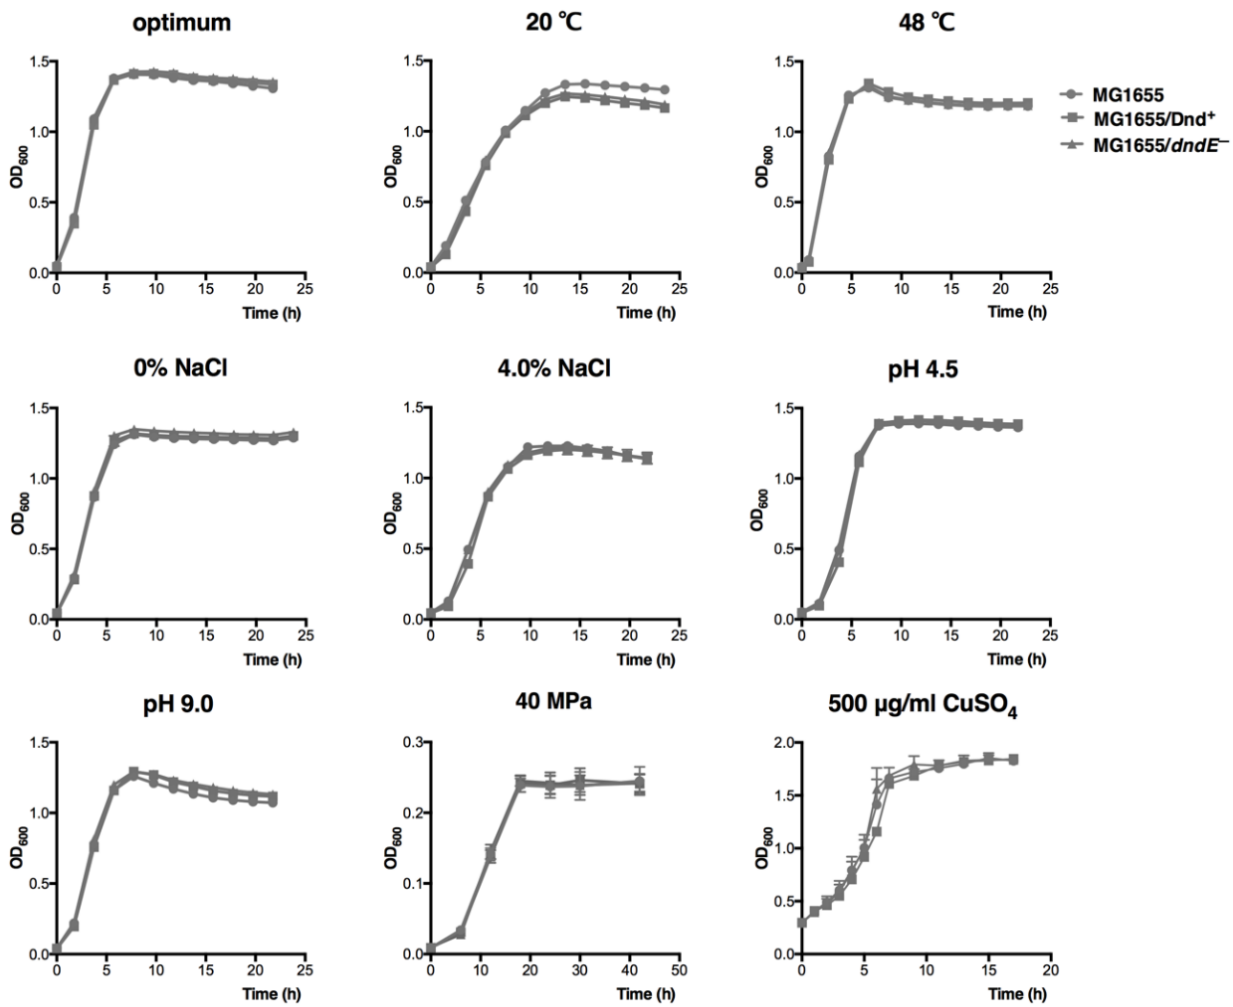

**Fig. S24.** Growth curves of *E. coli* MG1655 PT strains under multiple stress conditions. The growth of the strains was detected at OD<sub>600nm</sub>. Data are represented as mean ± s.d. and are based on three biologically independent samples.



**Table S1.** Correlation analysis of the occurrence of *dnd* gene/gene clusters and prophages at the genus/species level. Pearson correlation coefficient was calculated via the Python function “Pearsonr” from SciPy (v1.0) and linear regression analyses in R (v3.5.3). Two-sided unpaired Student *t* test was used to measure significance (*p* value). No adjustments were made for multiple comparisons.

|                | Gene/gene cluster | Pearson correlation coefficient | <i>p</i> value | Number of genus/species | Number of genomes |
|----------------|-------------------|---------------------------------|----------------|-------------------------|-------------------|
| <b>genus</b>   | <i>dndB</i>       | -0.916                          | 4.80E-13       | <i>n</i> =31            | 13565             |
|                | <i>dndC</i>       | -0.753                          | 1.04E-06       | <i>n</i> =31            | 13565             |
|                | <i>dndD</i>       | -0.737                          | 1.53E-06       | <i>n</i> =32            | 13693             |
|                | <i>dndE</i>       | -0.792                          | 1.09E-07       | <i>n</i> =31            | 13565             |
|                | <i>dndCD</i>      | -0.800                          | 6.45E-08       | <i>n</i> =31            | 13565             |
|                | <i>dndBCDE</i>    | -0.877                          | 9.56E-11       | <i>n</i> =31            | 13565             |
|                | <i>dndF</i>       | -0.876                          | 1.13E-10       | <i>n</i> =31            | 13565             |
|                | <i>dndG</i>       | -0.784                          | 1.81E-07       | <i>n</i> =31            | 13565             |
|                | <i>dndH</i>       | -0.783                          | 1.89E-07       | <i>n</i> =31            | 13565             |
|                | <i>dndFGH</i>     | -0.789                          | 1.31E-07       | <i>n</i> =31            | 13565             |
| <b>species</b> | <i>dndB</i>       | -0.884                          | 4.41E-13       | <i>n</i> =37            | 8334              |
|                | <i>dndC</i>       | -0.892                          | 1.28E-13       | <i>n</i> =37            | 8334              |
|                | <i>dndD</i>       | -0.676                          | 3.47E-07       | <i>n</i> =45            | 8749              |
|                | <i>dndE</i>       | -0.723                          | 9.58E-08       | <i>n</i> =41            | 8547              |
|                | <i>dndCD</i>      | -0.801                          | 2.68E-09       | <i>n</i> =37            | 8334              |
|                | <i>dndBCDE</i>    | -0.802                          | 2.49E-09       | <i>n</i> =37            | 8334              |
|                | <i>dndF</i>       | -0.875                          | 1.53E-12       | <i>n</i> =37            | 8334              |
|                | <i>dndG</i>       | -0.876                          | 1.25E-12       | <i>n</i> =37            | 8334              |
|                | <i>dndH</i>       | -0.781                          | 1.77E-09       | <i>n</i> =41            | 8499              |
|                | <i>dndFGH</i>     | -0.767                          | 3.13E-08       | <i>n</i> =37            | 8334              |

**Table S2.** Kinetic parameters for the interaction between FpsR and PT-modified/normal DNA<sup>a</sup>.

|               | <b>Normal DNA</b> | <b>PT-modified DNA</b> |
|---------------|-------------------|------------------------|
| $K_a$ (1/ms)  | 6.32E+05          | 8.64E+05               |
| $K_a$ T value | 9.27E+01          | 9.46E+01               |
| $K_a$ SE      | 6.82E+03          | 9.32E+03               |
| $K_d$ (1/s)   | 4.43E-03          | 3.28E-03               |
| $K_d$ T value | 2.35E+02          | 2.31E+02               |
| $K_d$ SE      | 1.89E-05          | 1.42E-05               |
| $K_D$ (M)     | 7.01E-09          | 3.80E-09               |
| $K_D$ SE      | 6.61E-21          | 1.95E-21               |

<sup>a</sup> Equilibrium dissociation constants ( $K_D$ ) were determined by surface plasmon resonance (SPR) using a Biacore 8K system. Errors listed in this table are the standard errors for the fit to a Langmuir 1:1 binding model.  $K_a$ , association rate constant;  $K_d$ , dissociation rate constant.

**Table S3.** Relative fitness of PT-modified *S. piezotolerans* WP3 strain as measured by competition assays.

| Temperature | Sample | Number of colonies | WP3NR/Dnd (%) <sup>a</sup> | WP3NR/DndΔE (%) <sup>a</sup> | Relative fitness |
|-------------|--------|--------------------|----------------------------|------------------------------|------------------|
| 28°C        | T0     | 212±13             | 50.67                      | 49.33                        | 1.1797±0.0468    |
|             | T1     | 202±14             | 33.67                      | 66.33                        | 1.1308±0.0128    |
|             | T5     | 171±23             | 6.67                       | 93.33                        | 1.1189±0.0051    |
| 20°C        | T0     | 329±26             | 52.33                      | 47.67                        | 1.0382±0.0272    |
|             | T1     | 345±27             | 48                         | 52                           | 1.0421±0.0031    |
|             | T5     | 352±31             | 31                         | 69                           | 1.0431±0.0102    |

<sup>a</sup>The average percentage of each strain identified by PCR (100 colonies per plate).

**Table S4.** Differentially expressed genes in WP3NR/Dnd by compared with WP3NR/Dnd $\Delta$ E. Data represents the averaged fold change (FC) of transcription level and are based on three biologically independent samples. The *P*-value corresponding to differential gene expression test was calculated by edgeR based on an overdispersed Poisson model<sup>8</sup>. False Discovery Rate (FDR) was used in the multiple hypothesis testing to correct for *P*-value by the Benjamini-Hochberg (BH) method.

| Gene ID     | log2FC  | <i>P</i> -value | FDR       | Protein ID     | Description                                                 |
|-------------|---------|-----------------|-----------|----------------|-------------------------------------------------------------|
| SWP_RS13835 | -3.0364 | 0.00E+00        | 0.00E+00  | WP_079891946.1 | marine proteobacterial sortase target protein               |
| SWP_RS13840 | -3.0283 | 0.00E+00        | 0.00E+00  | WP_020913159.1 | OmpA                                                        |
| SWP_RS13830 | -2.8235 | 2.04E-251       | 2.08E-248 | WP_052634186.1 | class GN sortase                                            |
| SWP_RS11570 | -2.4380 | 6.40E-10        | 2.31E-08  | WP_020912663.1 | zonular occludens toxin                                     |
| SWP_RS14445 | -2.0831 | 6.25E-03        | 4.39E-02  | WP_020913285.1 | hypothetical protein                                        |
| SWP_RS19905 | -1.9564 | 2.39E-191       | 1.62E-188 | WP_020914447.1 | class D beta-lactamase                                      |
| SWP_RS22130 | -1.7412 | 4.44E-18        | 2.92E-16  | WP_020914944.1 | hypothetical protein                                        |
| SWP_RS20105 | -1.5664 | 8.26E-158       | 4.81E-155 | WP_020914486.1 | porin                                                       |
| SWP_RS20440 | -1.5651 | 1.52E-156       | 7.76E-154 | WP_020914562.1 | TonB-dependent receptor                                     |
| SWP_RS13630 | -1.3941 | 1.61E-03        | 1.44E-02  | WP_020913110.1 | hypothetical protein                                        |
| SWP_RS19760 | -1.3370 | 4.25E-21        | 3.27E-19  | WP_020914413.1 | purine-nucleoside phosphorylase                             |
| SWP_RS10565 | -1.3175 | 5.30E-194       | 4.32E-191 | WP_020912467.1 | TonB-dependent receptor                                     |
| SWP_RS17750 | -1.2992 | 2.00E-12        | 9.07E-11  | WP_020913987.1 | heme utilization cytosolic carrier protein HutX             |
| SWP_RS13850 | -1.2741 | 3.34E-39        | 5.05E-37  | WP_044555935.1 | proteobacterial dedicated sortase system histidine kinase   |
| SWP_RS13845 | -1.2691 | 1.05E-59        | 2.86E-57  | WP_020913160.1 | proteobacterial dedicated sortase system response regulator |
| SWP_RS05840 | -1.2688 | 2.52E-04        | 3.08E-03  | WP_020911487.1 | hypothetical protein                                        |
| SWP_RS09445 | -1.2359 | 1.01E-08        | 3.05E-07  | WP_020912232.1 | NAD(P)/FAD-dependent oxidoreductase                         |
| SWP_RS17240 | -1.1983 | 2.84E-46        | 5.52E-44  | WP_020913886.1 | hypothetical protein                                        |

|             |         |           |           |                |                                                           |
|-------------|---------|-----------|-----------|----------------|-----------------------------------------------------------|
| SWP_RS04225 | -1.1928 | 1.53E-55  | 3.47E-53  | WP_020911140.1 | CBS domain-containing protein                             |
| SWP_RS08090 | -1.1521 | 7.14E-04  | 7.25E-03  | WP_044555782.1 | tol-pal system-associated acyl-CoA thioesterase           |
| SWP_RS08380 | -1.1447 | 5.44E-04  | 5.85E-03  | WP_020912028.1 | azurin                                                    |
| SWP_RS21235 | -1.1204 | 3.66E-09  | 1.19E-07  | WP_020914743.1 | hypothetical protein                                      |
| SWP_RS22125 | -1.0629 | 6.20E-25  | 5.62E-23  | WP_020914943.1 | hypothetical protein                                      |
| SWP_RS22120 | -1.0619 | 6.08E-57  | 1.46E-54  | WP_020914942.1 | DNA-binding response regulator                            |
| SWP_RS02595 | -1.0458 | 4.61E-03  | 3.47E-02  | WP_052634156.1 | hypothetical protein                                      |
| SWP_RS22005 | -1.0385 | 5.59E-03  | 4.03E-02  | WP_020914918.1 | VUT family protein                                        |
| SWP_RS11335 | -1.0324 | 1.00E-30  | 1.24E-28  | WP_020912616.1 | bifunctional metallophosphatase/5'-nucleotidase           |
| SWP_RS02455 | -1.0036 | 5.56E-04  | 5.96E-03  | WP_020910746.1 | hypothetical protein                                      |
| SWP_RS17785 | -1.0010 | 5.24E-03  | 3.85E-02  | WP_044556508.1 | heme ABC transporter ATP-binding protein                  |
| SWP_RS20550 | 1.0133  | 6.73E-03  | 4.64E-02  | WP_020914585.1 | STAS/SEC14 domain-containing protein                      |
| SWP_RS18475 | 1.0359  | 7.94E-08  | 2.04E-06  | WP_020914144.1 | Probable cytochrome-c peroxidase                          |
| SWP_RS17675 | 1.0647  | 1.98E-60  | 5.76E-58  | WP_020913969.1 | ammonia-forming nitrite reductase cytochrome c552 subunit |
| SWP_RS13815 | 1.0943  | 1.68E-04  | 2.15E-03  | WP_020913154.1 | hypothetical protein                                      |
| SWP_RS15855 | 1.0978  | 3.39E-67  | 1.15E-64  | WP_020913587.1 | TonB-dependent receptor                                   |
| SWP_RS02860 | 1.1086  | 6.40E-03  | 4.46E-02  | WP_020910846.1 | chitinase                                                 |
| SWP_RS07595 | 1.1212  | 5.15E-67  | 1.62E-64  | WP_020911855.1 | TonB-dependent receptor                                   |
| SWP_RS16275 | 1.1471  | 1.25E-06  | 2.56E-05  | WP_020913687.1 | OsmC family peroxiredoxin                                 |
| SWP_RS11885 | 1.1614  | 6.50E-37  | 9.14E-35  | WP_044555880.1 | hydrogenase                                               |
| SWP_RS17950 | 1.2004  | 1.36E-75  | 5.05E-73  | WP_020914033.1 | TonB-dependent receptor                                   |
| SWP_RS01970 | 1.2848  | 2.03E-06  | 4.00E-05  | WP_020910642.1 | fumarate reductase respiratory complex%2C subunit         |
| SWP_RS19980 | 1.3404  | 1.22E-131 | 5.55E-129 | WP_020914464.1 | lipase family protein                                     |
| SWP_RS19985 | 1.3572  | 1.18E-78  | 4.82E-76  | WP_020914465.1 | hypothetical protein                                      |
| SWP_RS19990 | 1.3596  | 1.00E-11  | 4.27E-10  | WP_020914466.1 | hypothetical protein                                      |
| SWP_RS11310 | 1.3992  | 1.19E-06  | 2.45E-05  | WP_020912611.1 | FAD:protein FMN transferase                               |

|             |        |          |          |                |                                                                 |
|-------------|--------|----------|----------|----------------|-----------------------------------------------------------------|
| SWP_RS19975 | 1.4061 | 1.04E-54 | 2.24E-52 | WP_020914463.1 | DUF1508 domain-containing protein                               |
| SWP_RS02420 | 1.4293 | 2.46E-07 | 5.98E-06 | WP_044555588.1 | hypothetical protein                                            |
| SWP_RS05470 | 1.5297 | 2.10E-04 | 2.62E-03 | WP_020911408.1 | DNA-binding response regulator                                  |
| SWP_RS09400 | 1.5584 | 3.51E-03 | 2.77E-02 | WP_044555807.1 | hypothetical protein                                            |
| SWP_RS17205 | 1.5867 | 6.38E-03 | 4.45E-02 | WP_020913879.1 | RNA polymerase sigma factor                                     |
| SWP_RS07215 | 1.6129 | 1.16E-03 | 1.10E-02 | WP_048908459.1 | hypothetical protein                                            |
| SWP_RS09565 | 1.7216 | 1.15E-04 | 1.53E-03 | WP_044555815.1 | LysR family transcriptional regulator                           |
| SWP_RS11920 | 1.7720 | 2.47E-03 | 2.08E-02 | WP_020912737.1 | HypC/HybG/HupF family hydrogenase formation chaperone           |
| SWP_RS15615 | 1.8168 | 4.01E-04 | 4.51E-03 | WP_020913538.1 | NADPH:quinone reductase and related Zn-dependent oxidoreductase |
| SWP_RS04865 | 2.0237 | 1.69E-53 | 3.44E-51 | WP_020911283.1 | hypothetical protein                                            |
| SWP_RS04770 | 2.6177 | 1.64E-03 | 1.47E-02 | WP_020911263.1 | hypothetical protein                                            |
| SWP_RS17130 | 4.3937 | 1.02E-45 | 1.90E-43 | WP_044556498.1 | alkaline phosphatase                                            |
| SWP_RS17125 | 5.1544 | 0.00E+00 | 0.00E+00 | WP_044556048.1 | TonB-dependent receptor                                         |

**Table S5.** Bacterial strains and plasmids used in this study.

| Strain or plasmid                   | Relevant genotype                                                                                                                             | Reference or source |
|-------------------------------------|-----------------------------------------------------------------------------------------------------------------------------------------------|---------------------|
| <i>E. coli</i> strains              |                                                                                                                                               |                     |
| WM3064                              | Donor strain for conjugation; $\Delta dapA$                                                                                                   | Lab stock           |
| C41(DE3)                            | Recombinant protein expression host                                                                                                           | GE healthcare       |
| BW25113                             | <i>E. coli</i> K-12 derivative                                                                                                                | 9                   |
| JW3350                              | <i>E. coli</i> BW25113 $\Delta dam$ mutant                                                                                                    | 9                   |
| MG1655                              | <i>E. coli</i> K-12 wild type strain                                                                                                          | 10                  |
| MG1655/Dnd+                         | MG1655 strain harboring pJTU1238                                                                                                              | This work           |
| MG1655/Dnd-                         | MG1655 strain harboring pJTU3529                                                                                                              | This work           |
| <i>Shewanella</i> strains           |                                                                                                                                               |                     |
| MR-1                                | <i>S. oneidensis</i> MR-1 wild type strain                                                                                                    | Dr. Xiaoxue Wang    |
| W3-18-1                             | <i>S. putrefaciens</i> W3-18-1 wild type strain                                                                                               | Dr. Xiaoxue Wang    |
| <i>S. piezotolerans</i> WP3 strains |                                                                                                                                               |                     |
| WP3                                 | <i>S. piezotolerans</i> WP3 wild type strain                                                                                                  | 11                  |
| WP3NR                               | Wild-type WP3 strain with 3 endonuclease-encoding genes ( <i>swp0009</i> , <i>swp0840</i> , <i>swp2190</i> ) and phage SW1 deletion           | 6                   |
| WP3NR/Dnd                           | WP3NR strain harboring pSW2Dnd                                                                                                                | 6                   |
| WP3NR/Dnd $\Delta$ E                | WP3NR strain harboring pSW2Dnd $\Delta$ E                                                                                                     | This work           |
| WP3NR/Dnd-IG                        | WP3NR strain harboring pSW2Dnd-IG                                                                                                             | This work           |
| WP3NR/Dnd $\Delta$ E-IG             | WP3NR strain harboring pSW2Dnd $\Delta$ E-IG                                                                                                  | This work           |
| WP3NR/Dnd $\Delta$ R                | WP3NR strain harboring pSW2Dnd $\Delta$ R                                                                                                     | This work           |
| WP3NR/Dnd $\Delta$ E $\Delta$ R     | WP3NR strain harboring pSW2Dnd $\Delta$ E $\Delta$ R                                                                                          | This work           |
| WP3 $\Delta$ RE                     | Wild-type WP3 strain with 3 endonuclease-encoding genes ( <i>swp0009</i> , <i>swp0840</i> , <i>swp2190</i> ) deletion                         | Lab stock           |
| WP3 $\Delta$ RE/Dnd                 | WP3 $\Delta$ RE strain harboring pSW2Dnd                                                                                                      | This work           |
| WP3 $\Delta$ RE/Dnd $\Delta$ E      | WP3 $\Delta$ RE strain harboring pSW2Dnd $\Delta$ E                                                                                           | This work           |
| Plasmids                            |                                                                                                                                               |                     |
| pSW2                                | ChI <sup>r</sup> , derived from the filamentous bacteriophage SW1                                                                             | 12                  |
| pSW3                                | pSW2 containing <i>pepN</i> , used for SW1 RF- and ssDNA quantification                                                                       | 13                  |
| pET24b                              | Kan <sup>r</sup> , His-tag protein expression vector                                                                                          | Novagen             |
| pJTU1238                            | pBluescript II sk (+) derivative carrying a 6.7 kb fragment of <i>dndBCDE</i> gene cluster from <i>S. enterica</i> Cerro 87, Amp <sup>r</sup> | 14                  |
| pJTU3529                            | A derivative of pJTU1238, <i>dndE</i> , in-frame deletion, Amp <sup>r</sup>                                                                   | 15                  |
| pJTU3619                            | pET15b carrying <i>dndA</i> from <i>E. coli</i>                                                                                               | 16                  |
| pSW2Dnd                             | pSW2 derivative carrying <i>dndA</i> from pJTU3619 and <i>dndBCDE</i> from pJTU1238                                                           | 6                   |
| pSW2Dnd $\Delta$ E                  | pSW2Dnd with deletion of <i>dndE</i> gene                                                                                                     | This work           |
| pSW2Dnd-IG                          | pSW2Dnd with mutation of PT sites in the intergenic region between <i>fpsA</i> and <i>fpsR</i>                                                | This work           |
| pSW2Dnd $\Delta$ E-IG               | pSW2Dnd $\Delta$ E with mutation of PT sites in the intergenic region between <i>fpsA</i> and <i>fpsR</i>                                     | This work           |
| pSW2Dnd $\Delta$ R                  | pSW2Dnd with deletion of <i>fpsR</i> gene                                                                                                     | This work           |

---

|                     |                                                             |           |
|---------------------|-------------------------------------------------------------|-----------|
| pSW2DndΔEΔR         | pSW2DndΔE with deletion of <i>fpsR</i> gene                 | This work |
| pET24b- <i>fpsR</i> | pET24b containing the coding region of the <i>fpsR</i> gene | This work |

---



**Table S6.** Primers and oligonucleotides used in this study.

| Name         | Sequence (5'-3')                  | Description          |
|--------------|-----------------------------------|----------------------|
| pSW2dndFor   | CTCGAGATGAAATTACCGATTTATCTCGACTAC | Vector construction  |
| pSW2dndRev   | CTCGAGGCCAGCCTCGCAGAGCAGGATTCC    | Vector construction  |
| dndBczFor    | ATGGCTAGTGTTGATGCAGA              | Vector construction  |
| dndBczRev    | TCTGCATCAACACTAGCCAT              | Vector construction  |
| KOndEFor     | CTGTCTGATGTAGAATAATATGGCACCATGAA  | Vector construction  |
| KOndERev     | TATTATTCTACATCAGACAGCCTCCTTGGTT   | Vector construction  |
| SW1IGczFor   | CTAGATTTTCTGAGCTGCTGATCAT         | Vector construction  |
| SW1IGczRev   | CGAGCGGACGCAGACTCAACCGA           | Vector construction  |
| SW1IGdoczFor | GTTGAGTCTGCGTCCGCTCGACTTA         | Vector construction  |
| SW1IGupczRev | GCAGCTCAGAAAATCTAGAAAACGG         | Vector construction  |
| pSW2dndczFor | CAGGGAACCGGCCGCACTGCA             | Vector construction  |
| pSW2dndczRev | GTAATTTTCATCTCGAGGCCAGCCTC        | Vector construction  |
| KOndEyzFor   | ATCAGGTTGTGCTGCTATCCA             | Vector construction  |
| KOndEyzRev   | ACTAATGTTAGGAGTTTGATTTACC         | Vector construction  |
| KOfpsRyzFor  | TACATTGTGCGAATTCCTCTCGA           | Vector construction  |
| KOfpsRyzRev  | CAGTAGTACAAGACCGAACACCA           | Vector construction  |
| pSW2seqFor   | AGCGGGTGTTCCCTTCTTCACTG           | Vector construction  |
| pSW2seqFev   | CCTAATCTTCTGCGACCTCTGG            | Vector construction  |
| pSW2For      | GCCCCTTAAGCGTTATTATCACTTATTCA     | Plasmid verification |
| pSW2Rev      | TATGGAAAATAAATAAATCCTGGTGTCC      | Plasmid verification |
| SW1RFRTFor   | CACGCCATACGTTAATGAGTCTCT          | qPCR                 |
| SW1RFRTRev   | GACGGCCAGTATTCAACATAACAT          | qPCR                 |

---

|           |                                                                      |      |
|-----------|----------------------------------------------------------------------|------|
| pepNRTFor | TTAAGGCAATGGAAGCTGCAT                                                | qPCR |
| pepNRTRev | CGTCTTTACCCGTTAATGATACGA                                             | qPCR |
| tonRTFor  | TGCCAGTAGTGGTGGCTCTCTT                                               | qPCR |
| tonRTRev  | TGAGCTTGCACTGTCCGGTAAA                                               | qPCR |
| alkRTFor  | GGCCACAGCAACGATATTAGC                                                | qPCR |
| alkRTRev  | GACCGTCTTCGCCAAATCAT                                                 | qPCR |
| lysRTFor  | AACCGCGAAATTGGCAACT                                                  | qPCR |
| lysRTRev  | AATGCGGCCGAATGATTG                                                   | qPCR |
| hemRTFor  | CGCCGACAGGCTAATCGTT                                                  | qPCR |
| hemRTRev  | CGGCGATCCATCACTGACT                                                  | qPCR |
| zonRTFor  | GTCAAGGCGTTTTATTTGTTGTTG                                             | qPCR |
| zonRTRev  | CTTGGCGTCACGGCCTAT                                                   | qPCR |
| marRTFor  | AAGCAAACGGTGGCACTGA                                                  | qPCR |
| marRTRev  | TCCTGCTGAGACAGCGCTTT                                                 | qPCR |
| gluRTFor  | TCCACCTAACTTGCGGCTTA                                                 | qPCR |
| gluRTRev  | TCGCCATCGCCTTACGA                                                    | qPCR |
| fpsARTFor | GGCCACAACGCTACAATGG                                                  | qPCR |
| fpsARTRev | TGTTGCGCCTTTTCCTTAGCT                                                | qPCR |
| fpsBRTFor | CCGACCCAAACGGTAGATGT                                                 | qPCR |
| fpsBRTRev | CCTGTAGCGTTTTAGGGTCTTTCA                                             | qPCR |
| recARTFor | GCAGCAGCGCAGAAGCA                                                    | qPCR |
| recARTRev | GATCCAAGGCATGTTCTGCAT                                                | qPCR |
| lexARTFor | GGAACCGGAAGAGGTCGAA                                                  | qPCR |
| lexARTRev | GCTCACCTGCAGCAACTTGA                                                 | qPCR |
| O4(PT)-F  | 5'-Biotin-TTTTACGCTTGAGCTTTATATTTTCACCAATTGTCATTTTTG*AACCTTTGTGGGGGC | SPR  |

---

|               |                                                                                                                                         |                        |
|---------------|-----------------------------------------------------------------------------------------------------------------------------------------|------------------------|
| O4(PT)-R      | GCCCCCACAAGG*TTCAAAAATGACAATTGGTGAAAATATAAAGCTCAAGCGTAAAA                                                                               | SPR                    |
| O4-F          | 5'-Biotin-TTTTACGCTTGAGCTTTATATTTTCACCAATTGTCATTTTTGAACCTTTGTGGGGGC                                                                     | SPR                    |
| O4-R          | GCCCCCACAAGGTTCAAAAATGACAATTGGTGAAAATATAAAGCTCAAGCGTAAAA                                                                                | SPR                    |
| O4-fpsA(PT)-F | GGCTTTTACGCTTGAGCTTTATATTTTCACCAATTGTCATTTTTG*AACCTTTGTGGGGGCATGT<br>ATGACTTATTTAAACTATTTTCTTGCATGTTTGATCTTTAGGTTGTACGCTTGCGTCATATTGATT | In vitro transcription |
| O4-fpsA(PT)-R | AATCAATATGACGCAAGCGTACAACCTAAAGATCAAACATGCAAGAAAATAGTTTAAATAAGTCAT<br>ACATGCCCCCACAAGG*TTCAAAAATGACAATTGGTGAAAATATAAAGCTCAAGCGTAAAAGCC  | In vitro transcription |
| O4-fpsA-F     | GGCTTTTACGCTTGAGCTTT                                                                                                                    | In vitro transcription |
| O4-fpsA-R     | AATCAATATGACGCAAGCG                                                                                                                     | In vitro transcription |

\*, PT modification site

## References

1. Chaumeil P-A, Mussig AJ, Hugenholtz P, Parks DH. GTDB-Tk: a toolkit to classify genomes with the Genome Taxonomy Database. *Bioinformatics* **36**, 1925-1927 (2020).
2. Price MN, Dehal PS, Arkin AP. FastTree 2 – Approximately Maximum-Likelihood Trees for Large Alignments. *PLoS One* **5**, e9490 (2010).
3. Letunic I, Bork P. Interactive Tree Of Life (iTOL) v4: recent updates and new developments. *Nucleic Acids Res* **47**, W256-W259 (2019).
4. Arndt D, *et al.* PHASTER: a better, faster version of the PHAST phage search tool. *Nucleic Acids Res* **44**, W16-21 (2016).
5. Tong T, *et al.* Occurrence, evolution, and functions of DNA phosphorothioate epigenetics in bacteria. *Proc Natl Acad Sci U S A* **115**, E2988-E2996 (2018).
6. Yang Y, *et al.* DNA Backbone Sulfur-Modification Expands Microbial Growth Range under Multiple Stresses by its anti-oxidation function. *Sci Rep* **7**, (2017).
7. Wu X, *et al.* Epigenetic competition reveals density-dependent regulation and target site plasticity of phosphorothioate epigenetics in bacteria. *PNAS* **117**, 14322-14330 (2020).
8. Robinson MD, McCarthy DJ, Smyth GK. edgeR: a Bioconductor package for differential expression analysis of digital gene expression data. *Bioinformatics* **26**, 139-140 (2010).
9. Baba T, *et al.* Construction of *Escherichia coli* K-12 in-frame, single-gene knockout mutants: the Keio collection. *Mol Syst Biol* **2**, 2006.0008 (2006).
10. Blattner FR, *et al.* The complete genome sequence of *Escherichia coli* K-12. *Science* **277**, 1453-1462 (1997).
11. Jian H, Xiao X, Wang F. Role of filamentous phage SW1 in regulating the lateral flagella of *Shewanella piezotolerans* strain WP3 at low temperatures. *Appl Environ Microbiol* **79**, 7101-7109 (2013).
12. Yang X, Jian H, Wang F. pSW2, a novel low-temperature-inducible gene expression vector based on a filamentous phage of the deep-sea bacterium *Shewanella piezotolerans* WP3. *Appl Environ Microbiol* **81**, 5519-5526 (2015).
13. Jian H, Xu J, Xiao X, Wang F. Dynamic modulation of DNA replication and gene transcription in deep-sea filamentous phage SW1 in response to changes of host growth and temperature. *PLoS One* **7**, e41578 (2012).

14. Wang L, *et al.* Phosphorothioation of DNA in bacteria by *dnd* genes. *Nat Chem Biol* **3**, 709-710 (2007).
15. Xie X, *et al.* Phosphorothioate DNA as an antioxidant in bacteria. *Nucleic Acids Res* **40**, 9115-9124 (2012).
16. An X, *et al.* A Novel Target of IscS in *Escherichia coli*: Participating in DNA phosphorothioation. *PLoS One* **7**, e51265 (2012).
